# Supplementary material for: The Burden of Proof studies: assessing the evidence of risk
Source: PubMed Central journal article supplement (PMC9556298; doi:10.1038/s41591-022-01973-2), 2022-10-10
Supplement: 41591_2022_1973_MOESM1_ESM.pdf [file 41591_2022_1973_MOESM1_ESM.pdf]

**Supplementary information**

---

**The Burden of Proof studies: assessing the evidence of risk**

---

In the format provided by the authors and unedited

Supplementary Information: Supplementary tables for: “The Burden of Proof studies: assessing the evidence of risk”

## Table of Contents

|                                                                                                                                           |    |
|-------------------------------------------------------------------------------------------------------------------------------------------|----|
| Supplementary Table 1: The relative risk at different levels of exposure, smoking (pack-years) and lung cancer ...                        | 3  |
| Supplementary Table 2: The relative risk at different levels of exposure, systolic blood pressure (mmHg) and ischemic heart disease ..... | 3  |
| Supplementary Table 3: The relative risk at different levels of exposure, vegetables (g/day) and ischemic heart disease.....              | 3  |
| Supplementary Table 4: The relative risk at different levels of exposure, unprocessed red meat (g/day) and ischemic heart disease .....   | 4  |
| Supplementary Table 5: Sensitivity study results (ROS, star rating, and small study effect) with trimming and without trimming .....      | 4  |
| Supplementary Table 6: GATHER checklist.....                                                                                              | 5  |
| Supplementary Table 7: Study characteristics for all included studies, smoking and lung cancer .....                                      | 6  |
| Supplementary Table 8: Study characteristics for all included studies, systolic blood pressure and ischemic heart disease.....            | 18 |
| Supplementary Table 9: Study characteristics for all included studies, vegetables and ischemic heart disease.....                         | 23 |
| Supplementary Table 10: Study characteristics for all included studies, unprocessed red meat and ischemic heart disease.....              | 26 |
| Supplementary Table 11: Study quality for all included studies, smoking and lung cancer.....                                              | 27 |
| Supplementary Table 12: Study quality for all included studies, systolic blood pressure and ischemic heart disease .....                  | 31 |
| Supplementary Table 13: Study quality for all included studies, vegetables and ischemic heart disease .....                               | 33 |
| Supplementary Table 14: Study quality for all included studies, unprocessed red meat and ischemic heart disease .....                     | 34 |

**Supplementary Table 1: The relative risk at different levels of exposure, smoking (pack-years) and lung cancer**

The RRs with conventional and conservative UIs reference the mean RR and 95% UI from the risk curve without between-study heterogeneity (conventional) and with between-study heterogeneity (conservative) at different levels of exposure. The conservative UIs are the reported in the main text. The lower and upper bound of the 95% UI are the 2.5th and 97.5th percentiles of the 1000 draws of the relative risk for each exposure level. RR = relative risk. UI = uncertainty interval.

| <b>Exposure (pack-years)</b> | <b>RR with conventional UI</b> | <b>RR with conservative UI</b> |
|------------------------------|--------------------------------|--------------------------------|
| 0                            | 1 (1,1)                        | 1 (1,1)                        |
| 5                            | 1.58 (1.53, 1.64)              | 1.58 (1.16, 2.16)              |
| 10                           | 2.48 (2.31, 2.66)              | 2.48 (1.34, 4.58)              |
| 15                           | 3.65 (3.30, 4.04)              | 3.65 (1.52, 8.80)              |
| 20                           | 5.08 (4.48, 5.77)              | 5.08 (1.68, 15.33)             |
| 25                           | 6.76 (5.82, 7.84)              | 6.76 (1.85, 24.72)             |
| 30                           | 8.61 (7.28, 10.18)             | 8.61 (2.00, 37.12)             |
| 40                           | 11.54 (9.54, 13.96)            | 11.54 (2.19, 60.71)            |
| 60                           | 13.78 (11.24, 16.91)           | 13.78 (2.32, 81.85)            |
| 80                           | 14.02 (11.41, 17.22)           | 14.02 (2.33, 84.22)            |
| 100                          | 14.03 (11.42, 17.23)           | 14.03 (2.33, 84.30)            |

**Supplementary Table 2: The relative risk at different levels of exposure, systolic blood pressure (mmHg) and ischemic heart disease**

The RRs with conventional and conservative UIs reference the mean RR and 95% UI from the risk curve without between-study heterogeneity (conventional) and with between-study heterogeneity (conservative) at different levels of exposure. The conservative UIs are the reported in the main text. The lower and upper bound of the 95% UI are the 2.5th and 97.5th percentiles of the 1000 draws of the relative risk for each exposure level. RR = relative risk. SBP = systolic blood pressure. UI = uncertainty interval.

| <b>SBP level (mmHg)</b> | <b>RR with conventional UI</b> | <b>RR with conservative UI</b> |
|-------------------------|--------------------------------|--------------------------------|
| 100                     | 1 (1,1)                        | 1 (1,1)                        |
| 110                     | 1.12 (1.11, 1.12)              | 1.12 (1.10, 1.13)              |
| 120                     | 1.39 (1.36, 1.41)              | 1.39 (1.34, 1.44)              |
| 130                     | 1.81 (1.75, 1.87)              | 1.81 (1.70, 1.93)              |
| 140                     | 2.38 (2.27, 2.50)              | 2.38 (2.17, 2.62)              |
| 150                     | 3.11 (2.92, 3.31)              | 3.11 (2.75, 3.52)              |
| 160                     | 3.99 (3.70, 4.30)              | 3.99 (3.43, 4.63)              |
| 170                     | 4.95 (4.54, 5.41)              | 4.95 (4.17, 5.89)              |
| 180                     | 5.66 (5.14, 6.22)              | 5.66 (4.69, 6.82)              |
| 190                     | 6.15 (5.57, 6.79)              | 6.15 (5.05, 7.48)              |
| 200                     | 6.64 (5.98, 7.36)              | 6.64 (5.41, 8.15)              |

**Supplementary Table 3: The relative risk at different levels of exposure, vegetables (g/day) and ischemic heart disease**

The RRs with conventional and conservative UIs reference the mean RR and 95% UI from the risk curve without between-study heterogeneity (conventional) and with between-study heterogeneity (conservative) at different levels of exposure. The conservative UIs are the reported in the main text. The lower and upper bound of the 95% UI are the 2.5th and 97.5th percentiles of the 1000 draws of the relative risk for each exposure level. g = grams. RR = relative risk. UI = uncertainty interval.

| Intake level (g/day) | RR with conventional UI | RR with conservative UI |
|----------------------|-------------------------|-------------------------|
| 0                    | 1 (1,1)                 | 1 (1,1)                 |
| 50                   | 0.82 (0.76, 0.87)       | 0.82 (0.73, 0.91)       |
| 100                  | 0.81 (0.75, 0.87)       | 0.81 (0.72, 0.90)       |
| 150                  | 0.80 (0.74, 0.86)       | 0.80 (0.71, 0.90)       |
| 200                  | 0.79 (0.74, 0.86)       | 0.79 (0.70, 0.90)       |
| 250                  | 0.79 (0.72, 0.85)       | 0.79 (0.69, 0.89)       |
| 300                  | 0.78 (0.71, 0.85)       | 0.78 (0.68, 0.89)       |

**Supplementary Table 4: The relative risk at different levels of exposure, unprocessed red meat (g/day) and ischemic heart disease**

The RRs with conventional and conservative UIs reference the mean RR and 95% UI from the risk curve without between-study heterogeneity (conventional) and with between-study heterogeneity (conservative) at different levels of exposure. The conservative UIs are the reported in the main text. The lower and upper bound of the 95% UI are the 2.5th and 97.5th percentiles of the 1000 draws of the relative risk for each exposure level. g = grams. RR = relative risk. UI = uncertainty interval.

| Intake level (g/day) | RR with conventional UI | RR with conservative UI |
|----------------------|-------------------------|-------------------------|
| 0                    | 1 (1,1)                 | 1 (1,1)                 |
| 25                   | 1.03 (1,1.05)           | 1.03 (1.02,1.04)        |
| 50                   | 1.09 (0.99,1.18)        | 1.09 (1.05,1.12)        |
| 75                   | 1.1 (0.99,1.21)         | 1.1 (1.06,1.14)         |
| 100                  | 1.12 (0.99,1.25)        | 1.12 (1.07,1.16)        |
| 125                  | 1.14 (0.99,1.29)        | 1.14 (1.08,1.19)        |
| 150                  | 1.16 (0.99,1.33)        | 1.16 (1.09,1.21)        |
| 175                  | 1.17 (0.99,1.37)        | 1.17 (1.1,1.23)         |
| 200                  | 1.19 (0.99,1.41)        | 1.19 (1.11,1.26)        |

**Supplementary Table 5: Sensitivity study results (ROS, star rating, and small study effect) with trimming and without trimming**

IHD = ischemic heart disease. ROS = risk-outcome score. SBP = systolic blood pressure.

| Risk-outcome pair          | Trimming |             |                    | No trimming |             |                    |
|----------------------------|----------|-------------|--------------------|-------------|-------------|--------------------|
|                            | ROS      | Star rating | Small study effect | ROS         | Star rating | Small study effect |
| Smoking - lung cancer      | 0.73     | 5           | 1                  | 0.18        | 3           | 1                  |
| SBP - IHD                  | 0.70     | 5           | 1                  | 0.50        | 4           | 0                  |
| Vegetables - IHD           | 0.13     | 2           | 1                  | 0.03        | 2           | 1                  |
| Unprocessed red meat - IHD | 0.01     | 2           | 0                  | -0.02       | 1           | 0                  |

**Supplementary Table 6: GATHER checklist**

| Item #                                                                                         | Checklist item                                                                                                                                                                                                                                                                                                                                                                            | Reported location                                                                                                                            |
|------------------------------------------------------------------------------------------------|-------------------------------------------------------------------------------------------------------------------------------------------------------------------------------------------------------------------------------------------------------------------------------------------------------------------------------------------------------------------------------------------|----------------------------------------------------------------------------------------------------------------------------------------------|
| <b>Objectives and funding</b>                                                                  |                                                                                                                                                                                                                                                                                                                                                                                           |                                                                                                                                              |
| 1                                                                                              | Define the indicator(s), populations (including age, sex, and geographic entities), and time period(s) for which estimates were made.                                                                                                                                                                                                                                                     | Main text methods overview                                                                                                                   |
| 2                                                                                              | List the funding sources for the work.                                                                                                                                                                                                                                                                                                                                                    | Main text acknowledgments section                                                                                                            |
| <b>Data Inputs</b>                                                                             |                                                                                                                                                                                                                                                                                                                                                                                           |                                                                                                                                              |
| For all data inputs from multiple sources that are synthesized as part of the study:           |                                                                                                                                                                                                                                                                                                                                                                                           |                                                                                                                                              |
| 3                                                                                              | Describe how the data were identified and how the data were accessed.                                                                                                                                                                                                                                                                                                                     | Main text methods step 1                                                                                                                     |
| 4                                                                                              | Specify the inclusion and exclusion criteria. Identify all ad-hoc exclusions.                                                                                                                                                                                                                                                                                                             | Main text methods step 1                                                                                                                     |
| 5                                                                                              | Provide information on all included data sources and their main characteristics. For each data source used, report reference information or contact name/institution, population represented, data collection method, year(s) of data collection, sex and age range, diagnostic criteria or measurement method, and sample size, as relevant.                                             | Supplementary Tables 7–10                                                                                                                    |
| 6                                                                                              | Identify and describe any categories of input data that have potentially important biases (e.g., based on characteristics listed in item 5).                                                                                                                                                                                                                                              | Main text methods section steps 3–5                                                                                                          |
| For data inputs that contribute to the analysis but were not synthesized as part of the study: |                                                                                                                                                                                                                                                                                                                                                                                           |                                                                                                                                              |
| 7                                                                                              | Describe and give sources for any other data inputs.                                                                                                                                                                                                                                                                                                                                      | N/A                                                                                                                                          |
| For all data inputs:                                                                           |                                                                                                                                                                                                                                                                                                                                                                                           |                                                                                                                                              |
| 8                                                                                              | Provide all data inputs in a file format from which data can be efficiently extracted (e.g., a spreadsheet rather than a PDF), including all relevant meta-data listed in item 5. For any data inputs that cannot be shared because of ethical or legal reasons, such as third-party ownership, provide a contact name or the name of the institution that retains the right to the data. | Main text Data Availability statement                                                                                                        |
| <b>Data analysis</b>                                                                           |                                                                                                                                                                                                                                                                                                                                                                                           |                                                                                                                                              |
| 9                                                                                              | Provide a conceptual overview of the data analysis method. A diagram may be helpful.                                                                                                                                                                                                                                                                                                      | Main text methods overview                                                                                                                   |
| 10                                                                                             | Provide a detailed description of all steps of the analysis, including mathematical formulae. This description should cover, as relevant, data cleaning, data pre-processing, data adjustments and weighting of data sources, and mathematical or statistical model(s).                                                                                                                   | Main text methods steps 1–6                                                                                                                  |
| 11                                                                                             | Describe how candidate models were evaluated and how the final model(s) were selected.                                                                                                                                                                                                                                                                                                    | Main text methods step 7 (model validation)                                                                                                  |
| 12                                                                                             | Provide the results of an evaluation of model performance, if done, as well as the results of any relevant sensitivity analysis.                                                                                                                                                                                                                                                          | Figure 5, Extended Data Figures 1–9                                                                                                          |
| 13                                                                                             | Describe methods for calculating uncertainty of the estimates. State which sources of uncertainty were, and were not, accounted for in the uncertainty analysis.                                                                                                                                                                                                                          | Main text methods step 4                                                                                                                     |
| 14                                                                                             | State how analytic or statistical source code used to generate estimates can be accessed.                                                                                                                                                                                                                                                                                                 | Main text Code Availability statement                                                                                                        |
| <b>Results and Discussion</b>                                                                  |                                                                                                                                                                                                                                                                                                                                                                                           |                                                                                                                                              |
| 15                                                                                             | Provide published estimates in a file format from which data can be efficiently extracted.                                                                                                                                                                                                                                                                                                | Estimates can be downloaded from <a href="https://vizhub.healthdata.org/burden-of-proof/">https://vizhub.healthdata.org/burden-of-proof/</a> |
| 16                                                                                             | Report a quantitative measure of the uncertainty of the estimates (e.g. uncertainty intervals).                                                                                                                                                                                                                                                                                           | UIs are given for all findings, as relevant, including in the text, figures, and tables                                                      |
| 17                                                                                             | Interpret results in light of existing evidence. If updating a previous set of estimates, describe the reasons for changes in estimates.                                                                                                                                                                                                                                                  | Main text discussion                                                                                                                         |
| 18                                                                                             | Discuss limitations of the estimates. Include a discussion of any modelling assumptions or data limitations that affect interpretation of the estimates.                                                                                                                                                                                                                                  | Main text discussion                                                                                                                         |

**Supplementary Table 7: Study characteristics for all included studies, smoking and lung cancer**

In this presentation of the data, there is one row per study. Both = males + females, or all sexes, depending on study.

| Author   | Year | Study name             | Population                                                                                                             | Location              | Study design        | Sex    | Follow-up | Age start | Age end | Exposure assessment         | Endpoint  | Disease ascertainment                                      | Person-years | Events | Sample size | Outcomes                             | Cases | Controls | Control pool         |
|----------|------|------------------------|------------------------------------------------------------------------------------------------------------------------|-----------------------|---------------------|--------|-----------|-----------|---------|-----------------------------|-----------|------------------------------------------------------------|--------------|--------|-------------|--------------------------------------|-------|----------|----------------------|
| Vena     | 1985 |                        | White patients admitted to Roswell Park Memorial Institute                                                             | United States         | Case-control        | Male   |           | 35        | 79      | Pre-admission questionnaire | Incidence | Clinical records                                           |              |        |             | Lung cancer                          | 1002  | 2121     | Hospital             |
| Brownson | 1987 |                        | White adults in Denver metropolitan area                                                                               | Colorado, USA         | Case-control        | Both   |           | 30        | 99      | Personal interview          | Incidence | Disease registry                                           |              |        |             | Lung denocarcinoma (ICD 163)         | 102   | 233      | Disease registry     |
| Liu      | 1991 |                        | Farmers in Xuanwei, China                                                                                              | China                 | Case-control        | Male   |           | 18        | 99      | Administered questionnaire  | Incidence | Pathological diagnosis or clinical history                 |              |        |             | Lung cancer                          | 56    | 224      | Population           |
| Potter   | 1991 |                        | Female from the 1985 Iowa driver's license list                                                                        | Iowa, United States   | Nested case-control | Female |           | 55        | 69      | Mailed questionnaire        | Incidence | Disease registry                                           |              |        |             | Lung cancer (ICD 0-162)              | 109   | 2009     | Population           |
| Becher   | 1991 |                        | Hospital cases and controls and population controls from residence registries in the northwest                         | Germany               | Case-control        | Both   |           | 33        | 90      | Administered interviews     | Incidence | Clinical records of histologically confirmed cases         |              |        |             | Histologically confirmed lung cancer | 194   | 582      | Hospital, Population |
| Chyou    | 1992 | Honolulu Heart Program | American male of Japanese ancestry in Oahu                                                                             | Hawaii, United States | Prospective cohort  | Male   | 22        | 46        | 65      | Administered interview      | Incidence | Disease surveillance of hospitals with tissue confirmation |              | 212    | 8009        | Lung cancer (ICD-8 162.1)            |       |          |                      |
| Jockel   | 1992 |                        | Patients and hospital controls from seven hospitals in five German cities, and population controls from the city areas | Germany               | Case-control        | Both   |           | 38        | 87      | Administered interview      | Incidence | Clinical records of histologically confirmed lesions       |              |        |             | Lung cancer                          | 194   | 582      | Population           |
| Chiazze  | 1992 |                        | Participants in the Newark (TIMA) plant cohort                                                                         | Ohio, United States   | Nested case-control | Both   |           | 18        | 99      | Administered interviews     | Mortality | Death records coded by a qualified nosologist              |              |        |             | Lung cancer                          | 144   | 404      | Population           |

|                  |      |                        |                                                                                                                                       |                       |                    |      |    |    |    |                            |           |                              |  |     |      |                           |     |      |                   |
|------------------|------|------------------------|---------------------------------------------------------------------------------------------------------------------------------------|-----------------------|--------------------|------|----|----|----|----------------------------|-----------|------------------------------|--|-----|------|---------------------------|-----|------|-------------------|
| Chyou            | 1993 | Honolulu Heart Program | American male of Japanese ancestry in Oahu                                                                                            | Hawaii, United States | Prospective cohort | Male | 22 | 46 | 65 | Administered interview     | Incidence | Disease surveillance         |  | 227 | 7733 | Lung cancer               |     |      |                   |
| Risch            | 1993 |                        | Adults in metropolitan Toronto area and St. Catharines-Niagara Falls region of southern Ontario                                       | Canada                | Case-control       | Both |    | 30 | 79 | Administered questionnaire | Incidence | Clinical records             |  |     |      | Lung cancer               | 550 | 1100 | Population        |
| Brockmoller      | 1993 |                        | Patients from one specialized hospital in Berlin                                                                                      | Germany               | Case-control       | Both |    | 32 | 84 | Administered interviews    | Incidence | Clinical records             |  |     |      | Lung cancer               | 117 | 272  | Hospital          |
| Sankaranarayanan | 1994 |                        | Patients, visitors, and bystanders at the Regional Cancer Center                                                                      | Kerala, India         | Case-control       | Both |    | 30 | 99 | Administered interviews    | Incidence | Hospital disease registry    |  |     |      | Lung cancer               | 281 | 1488 | Hospital visitors |
| Suzuki           | 1994 |                        | Hospital-based cases and controls from Rio de Janeiro, Brazil                                                                         | Brazil                | Case-control       | Both |    | 30 | 89 | Administered interview     | Incidence | Histological confirmed cases |  |     |      | Lung carcinomas           | 123 | 246  | Hospital          |
| Siemiatycki      | 1994 |                        | Patients admitted to the hospital with lung cancer at the Graduate Institute of Medical Education and Research (PGIMER), Chandigarh." | Quebec, Canada        | case-control       | Male |    |    |    | administered interview     | Incidence | Hospital records             |  |     |      | lung cancer               | 146 | 146  | Varied            |
| Siemiatycki      | 1995 |                        | "Department of Pulmonary Medicine of Post                                                                                             | Quebec, Canada        | case-control       | Male |    |    |    | administered interview     | Incidence | Hospital records             |  |     |      | lung cancer (ICD C33-C34) | 370 | 370  | Population        |
| De Stefani       | 1996 |                        | Cases and controls admitted to the Instituto Nacional de Oncologia of Montevideo                                                      | Uruguay               | Case-control       | Male |    | 25 | 84 | Administered interview     | Incidence | Clinical records             |  |     |      | Lung cancer               | 497 | 994  | Hospital          |



|            |      |                                       |                                                                                 |                     |                    |      |    |    |    |                                            |           |                                                                                 |        |     |       |                                    |      |      |            |
|------------|------|---------------------------------------|---------------------------------------------------------------------------------|---------------------|--------------------|------|----|----|----|--------------------------------------------|-----------|---------------------------------------------------------------------------------|--------|-----|-------|------------------------------------|------|------|------------|
| Lei        | 1996 |                                       | Adults in Guangzhou                                                             | China               | Case-control       | Male |    | 18 | 99 | Administered interviews by proxy           | Mortality | Vital records                                                                   |        |     |       | Lung cancer                        | 792  | 1376 | Population |
| Cascorbi   | 1996 |                                       | German patients select hospitals                                                | Germany             | Case-control       | Both |    | 17 | 84 | Self-reported                              | Incidence | Clinical records                                                                |        |     |       | Lung cancer                        | 389  | 1046 | Hospital   |
| De Stefani | 1996 |                                       | Hospital-based cases and controls from 7 major hospitals in Montevideo, Uruguay | Uruguay             | Case-control       | Both |    | 30 | 89 | Administered interviews and questionnaires | Incidence | Clinical, radiological, and endoscopic diagnoses                                |        |     |       | Lung cancer                        | 320  | 640  | Hospital   |
| Yong       | 1997 | NHANES I Epidemiologic Followup Study | Sample of the civilian noninstitutionalized population of the United States     | United States       | Prospective cohort | Both | 22 | 25 | 74 | Administered interviews and questionnaires | Incidence | Hospital records and death certificates                                         | 191292 | 248 | 10068 | Lung cancer (ICD-9 162)            |      |      |            |
| Dosemeci   | 1997 |                                       | Non-civil servant employees                                                     | Turkey              | Case-control       | Male |    | 18 | 99 | Administrative medical records             | Incidence | Administrative medical records                                                  |        |     |       | Lung cancer                        | 1210 | 2039 | Clinic     |
| Jockel     | 1997 |                                       | Patients and population controls from Bremen and Frankfurt/Main                 | Germany             | Case-control       | Both |    | 33 | 80 | Administered interview                     | Incidence | Clinical records of histologically or cytologically confirmed cancerous lesions |        |     |       | Lung cancer                        | 1004 | 2008 | Population |
| Pawlega    | 1997 |                                       | Male lung cancer patients and adults in the electoral roll                      | Poland              | Case-control       | Male |    | 30 | 99 | Self-administered questionnaire            | Incidence | Disease registry of histologically confirmed cases                              |        |     |       | Lung cancer                        | 176  | 517  | Population |
| Barbone    | 1997 |                                       | Adults in the province of Trieste                                               | Italy               | Case-control       | Male |    | 36 | 98 | Structured interview                       | Mortality | Autopsy reports                                                                 |        |     |       | Lung cancer                        | 755  | 755  | Population |
| Hu         | 1997 |                                       | hospital-based cases and controls from Heilongjiang Province in China           | Heilongjiang, China | Case-control       | Both |    | 18 | 99 | Administered interviews and questionnaires | Incidence | Histological confirmed cases                                                    |        |     |       | Lung cancer                        | 227  | 454  | Hospital   |
| Liaw       | 1998 | 12-Year Follow-Up Study               | Adult residents of study townships and precincts                                | Taiwan              | Prospective cohort | Both | 12 | 41 | 99 | Administered interview                     | Mortality | Vital records                                                                   | 140493 | 127 | 14397 | Trachea, bronchus, and lung cancer |      |      |            |

|              |      |                            |                                                                                                       |           |                     |      |    |    |                                            |           |                                                                                 |  |     |      |                            |      |      |                  |
|--------------|------|----------------------------|-------------------------------------------------------------------------------------------------------|-----------|---------------------|------|----|----|--------------------------------------------|-----------|---------------------------------------------------------------------------------|--|-----|------|----------------------------|------|------|------------------|
| Wunsch-Filho | 1998 |                            | Hospital based cases and controls in Sao Paolo                                                        | Brazil    | Case-control        | Both | 33 | 90 | Administered questionnaire                 | Incidence | Clinical records of histologically or cytologically confirmed cancerous lesions |  |     |      | Lung cancer                | 398  | 1258 | Hospital         |
| Matos        | 1998 |                            | Patients and residents in the Province of Buenos Aires                                                | Argentina | Case-control        | Male | 30 | 99 | Administered interviews                    | Incidence | Clinical records                                                                |  |     |      | Lung cancer                | 200  | 597  | Hospital         |
| De Stefani   | 1998 |                            | Hospital-based cases and controls in Montevideo that were residents of Uruguay for more than 10 years | Uruguay   | Case-control        | Male | 30 | 89 | Administered interviews                    | Incidence | Clinical records                                                                |  |     |      | Adenocarcinoma of the lung | 426  | 845  | Hospital         |
| Kreuzer      | 1998 |                            | Cases and population controls from several regions in East and West Germany                           | Germany   | Case-control        | Both | 18 | 69 | Administered questionnaire                 | Incidence | Histologically or cytologically confirmed cases                                 |  |     |      | Lung cancer                | 2260 | 4579 | Population       |
| Nordlund     | 1999 | Swedish prospective cohort | Adults in the Swedish population register                                                             | Sweden    | Prospective cohort  | Both | 26 | 18 | Administered interviews and questionnaires | Incidence | Disease registry and vital records                                              |  | 345 | 4170 | Lung cancer                |      |      |                  |
| Band         | 1999 |                            | Male cancer patients                                                                                  | Canada    | Nested case-control | Male | 20 | 99 | Self-administered questionnaire            | Incidence | Disease registry                                                                |  |     |      | Lung cancer (ICD-9 162)    | 2998 | 7265 | Disease registry |
| Armada       | 1999 |                            | Hospital-based cases and controls from a public teaching hospital in Barcelona, Spain                 | Spain     | Case-control        | Male | 30 | 79 | Administered interviews and questionnaires | Incidence | Histologically or cytologically confirmed cases                                 |  |     |      | Lung cancer                | 325  | 650  | Hospital         |
| Dikshit      | 2000 |                            | Males in Bhopal                                                                                       | India     | Case-control        | Male | 18 | 99 | Administered questionnaire                 | Incidence | Disease registry                                                                |  |     |      | Lung cancer                | 163  | 423  | Population       |

|            |      |                                   |                                                                                                                                            |                                                       |                     |        |   |    |    |                                            |           |                                                               |        |     |        |  |                         |      |       |                   |
|------------|------|-----------------------------------|--------------------------------------------------------------------------------------------------------------------------------------------|-------------------------------------------------------|---------------------|--------|---|----|----|--------------------------------------------|-----------|---------------------------------------------------------------|--------|-----|--------|--|-------------------------|------|-------|-------------------|
| Mao        | 2001 |                                   | Adults in the provinces of British Columbia, Alberta, Saskatchewan, Manitoba, Ontario, Prince Edward Island, Nova Scotia, and Newfoundland | Canada                                                | Case-control        | Both   |   | 20 | 99 | Mailed questionnaire and phone interviews  | Incidence | Disease surveillance system of histologically confirmed cases |        |     |        |  | Lung cancer             | 3280 | 8353  | Population        |
| Simonato   | 2001 |                                   | Hospital-based cases and controls and population-based controls in 6 countries                                                             | Sweden, Germany, United Kingdom, France, Spain, Italy | Pooled case-control | Both   |   | 15 | 99 | Administered interviews                    | Incidence | Clinical records                                              |        |     |        |  | Lung cancer             | 6035 | 14002 | Varied            |
| Rachtan    | 2001 |                                   | Hospital-based cases and controls at a hospital in Cracow, Poland                                                                          | Poland                                                | Case-control        | Female |   | 18 | 99 | Administered interviews and questionnaires | Incidence | Histologically confirmed cases                                |        |     |        |  | Lung cancer (ICD-9 162) | 242  | 594   | Hospital contacts |
| Kubik      | 2002 |                                   | Hospital-based cases and controls from Prague University                                                                                   | Czechia                                               | Case-control        | Female |   | 25 | 89 | Administered interviews and questionnaires | Incidence | Microscopically verified cases                                |        |     |        |  | Lung cancer             | 269  | 1348  | Case contacts     |
| Ando       | 2003 | Japan Collaborative Cohort (JACC) | Adults in 45 study areas                                                                                                                   | Japan                                                 | Prospective cohort  | Both   | 9 | 40 | 79 | Questionnaire                              | Mortality | Vital records                                                 | 816614 | 597 | 100736 |  | Lung cancer             |      |       |                   |
| Chan-Yeung | 2003 |                                   | lung cancer patients from the Aichi Cancer Center, National Nagoya Hospital, and Nagoya First Red Cross Hospital                           | Hong Kong, China                                      | case-control        | Both   |   | 25 | 90 | self-administered questionnaire            | Incidence | Histological confirmed cases                                  |        |     |        |  | lung cancer             | 282  | 389   | Varied            |
| Kreuzer    | 2003 |                                   | residents of north eastern poland                                                                                                          | Germany                                               | case-control        | Female |   | 18 | 75 | administered interview                     | Incidence | Histological confirmed cases                                  |        |     |        |  | lung cancer             | 187  | 691   | Varied            |
| Zatloukal  | 2003 |                                   | Female's Health Initiative Studies                                                                                                         | Prague, Czech Republic                                | case-control        | Female |   | 25 | 89 | administered interview                     | Incidence | Histological confirmed cases                                  |        |     |        |  | lung cancer             | 334  | 578   | Hospital          |

|          |      |                                                    |                                                                                     |                                                                       |                     |      |    |    |    |                                 |           |                                                                                                                    |        |     |       |                                           |     |       |                  |
|----------|------|----------------------------------------------------|-------------------------------------------------------------------------------------|-----------------------------------------------------------------------|---------------------|------|----|----|----|---------------------------------|-----------|--------------------------------------------------------------------------------------------------------------------|--------|-----|-------|-------------------------------------------|-----|-------|------------------|
| Nishino  | 2004 | Miyagi Prefectural Cancer Registry                 | Residents in 14 municipalities of Miyagi Prefecture                                 | Japan                                                                 | Prospective cohort  | Male | 7  | 40 | 64 | Self-administered questionnaire | Incidence | Clinical records, radiology and pathology records, autopsy records, mass screening records, and death certificates | 166804 | 141 | 22836 | Lung cancer                               |     |       |                  |
| Marugame | 2005 | Three-Prefecture Cohort Study                      | Adults in Miyagi, Aichi, and Osaka                                                  | Japan                                                                 | Prospective cohort  | Both | 10 | 40 | 80 | Self-administered questionnaire | Mortality | Disease registry                                                                                                   | 748935 | 598 | 88133 | Lung cancer                               |     |       |                  |
| Sreeja   | 2005 |                                                    | female patients with newly diagnosed lung cancer from Prague University Hospital    | Kerala, India                                                         | case-control        | Both |    | 25 | 90 | self-administered questionnaire | Incidence | Hospital records                                                                                                   |        |     |       | lung cancer                               | 366 | 1624  | Hospital Visitor |
| Shimazu  | 2008 | Japan Public Health Center-based Prospective study | All registered Japanese inhabitants in the ten public health center areas           | Japan                                                                 | Prospective cohort  | Male | 14 | 40 | 69 | Self-administered questionnaire | Incidence | Voluntary reports from major hospitals, disease registries, and vital records                                      | 536325 | 561 | 50364 | Lung cancer                               |     |       |                  |
| Hosseini | 2009 |                                                    | patients at various hospitals diagnosed with lung cancer at participating hospitals | Tehran, Iran                                                          | case-control        | Both |    | 20 | 99 | administered interview          | Incidence | clinical records, confirmed with histology and cytology                                                            |        |     |       | Lung cancer                               |     |       |                  |
| Boffetta | 2010 |                                                    | hospital and community-based participants from 6 locations in the United States     | United States (California, Hawaii, Massachusetts, Michigan, New York) | Pooled case-control | Both |    | 18 | 99 | Self-reported                   | Incidence | Histological confirmed cases                                                                                       |        |     |       | Lung cancer, bronchioloalveolar carcinoma | 799 | 16658 | Varied           |

|                    |      |                          |                                                                                                                   |                   |                     |        |    |      |                                 |                                 |                                                           |                                                        |         |      |             |             |       |                  |  |
|--------------------|------|--------------------------|-------------------------------------------------------------------------------------------------------------------|-------------------|---------------------|--------|----|------|---------------------------------|---------------------------------|-----------------------------------------------------------|--------------------------------------------------------|---------|------|-------------|-------------|-------|------------------|--|
| Naghibzadeh-Tahami | 2010 |                          | "incident lung cancer cases from Cheng Ching General Hospital and Tungs' Taichung MetroHarbor Hospital in central | Iran              | case-control        | Both   | 40 | 80   | self-administered questionnaire | Incidence                       | Disease Registry - Cancer                                 |                                                        |         |      | Lung cancer | 242         | 242   | Hospital Visitor |  |
| Papadopoulou       | 2011 |                          | Female residents in 10 of the 11 French departements                                                              | France            | Case-control        | Female | 18 | 76   | Administered questionnaire      | Incidence                       | Pathology reports and clinical records                    |                                                        |         |      | Lung cancer | 648         | 1423  | Population       |  |
| Pesch              | 2012 |                          | Eight European and one Canadian case-control studies in SYNERGY database                                          | Europe and Canada | Pooled case-control | Both   | 18 | 99   | Administered interview          | Incidence                       | Clinical records                                          |                                                        |         |      | Lung cancer | 13168       | 16008 | Varied           |  |
| De Matteis         | 2012 |                          | Cases and population controls in 216 municipalities in Lombardy                                                   | Italy             | Case-control        | Both   | 35 | 79   | Computer-assisted interview     | Incidence                       | Tissue pathology, cytology, or review of clinical records |                                                        |         |      | Lung cancer | 1943        | 4059  | Population       |  |
| Thun               | 2013 |                          | Participants from 7 US-based cohort studies                                                                       | United States     | Prospective cohort  | Both   | 30 | 55   | 99                              | Administered questionnaire      | Mortality                                                 | Disease registry                                       | 5724508 | 5905 | 1463295     | Lung cancer |       |                  |  |
| Bae                | 2013 | Seoul Male Cancer Cohort | Male beneficiaries of Korean Medical Insurance Corporation                                                        | Republic of Korea | Prospective cohort  | Male   | 16 | 40   | 75                              | Self-administered questionnaire | Incidence                                                 | Disease registries                                     | 203870  | 123  | 14272       | Lung cancer |       |                  |  |
| He                 | 2013 |                          | Workers at a machinery factor in Xi'an                                                                            | China             | Prospective cohort  | Both   | 35 | 33.5 | 69.8                            | Administered interviews         | Mortality                                                 | Histopathological, clinical, or radiological diagnoses | 22076   | 45   | 1494        | Lung cancer |       |                  |  |

|          |      |                                                                                                                |                                                                                                        |                   |                    |      |    |    |     |                                 |           |                                    |          |      |         |                                                           |      |      |            |
|----------|------|----------------------------------------------------------------------------------------------------------------|--------------------------------------------------------------------------------------------------------|-------------------|--------------------|------|----|----|-----|---------------------------------|-----------|------------------------------------|----------|------|---------|-----------------------------------------------------------|------|------|------------|
| Everatt  | 2014 | Kunas-Rotterdam Intervention Study (KRIS) and Multifactorial Ischemic Heart Disease Prevention Study (MIHDP S) | Adult males in Kuanas                                                                                  | Lithuania         | Prospective cohort | Male | 30 | 40 | 59  | Administered interview          | Incidence | Disease registry and vital records | 133642.4 | 1780 | 6976    | Lung cancer (ICD C33-34, 162)                             |      |      |            |
| Freedman | 2015 | NIH-AARP                                                                                                       | AARP members                                                                                           | United States     | Prospective cohort | Both | 11 | 50 | 71  | Self-administered questionnaire | Incidence | Disease registry                   |          | 1973 | 452131  | Lung cancer                                               |      |      |            |
| Yun      | 2015 |                                                                                                                | Government employees and teachers in Korea                                                             | Republic of Korea | Prospective cohort | Both | 12 | 20 | 99  | Self-administered questionnaire | Incidence | Disease registry                   | 16270692 | 6491 | 1355891 | Lung cancer                                               |      |      |            |
| Schwartz | 2015 |                                                                                                                | newly diagnosed lung cancer patients at Hong Kong's biggest oncology center                            | Sao Paulo, Brazil | case-control       | Both |    | 33 | 90  | administered interview          | Incidence | Histological confirmed cases       |          |      |         | lung cancer (ICD C33-C34)                                 | 1208 | 1069 | Population |
| Hansen   | 2017 |                                                                                                                | Norwegians recruited from Norwegian Counties Study, 40 Years Study, and Cohort of Norway (CONOR) Study | Norway            | Prospective cohort | Both | 39 | 20 | 103 | Administered questionnaire      | Incidence | Disease registry                   | 11553611 | 6534 | 585583  | Carcinomas of the trachea, bronchus, and lung (ICD-7 162) |      |      |            |
| Lawania  | 2017 |                                                                                                                | newly diagnosed lung cancer patients from 15 hospitals around Germany                                  | Chandigarh, India | case-control       | Both |    | 26 | 90  | self-administered questionnaire | Incidence | Hospital records                   |          |      |         | lung cancer (ICD C33-C34)                                 | 811  | 912  | Population |

|           |      |                            |                                                                                                                                                                         |                 |                    |        |      |    |    |                                 |           |                                                                                               |        |      |       |                                                                                                                                      |     |      |            |
|-----------|------|----------------------------|-------------------------------------------------------------------------------------------------------------------------------------------------------------------------|-----------------|--------------------|--------|------|----|----|---------------------------------|-----------|-----------------------------------------------------------------------------------------------|--------|------|-------|--------------------------------------------------------------------------------------------------------------------------------------|-----|------|------------|
| Tindle    | 2018 | Framingham Heart Study     | Adult residents of Framingham, Massachusetts                                                                                                                            | United States   | Prospective cohort | Both   | 28.7 | 18 | 99 | Incidence                       | Incidence | Disease surveillance through medical record review, pathology reports, and laboratory reports | 384506 | 543  | 8907  | Lung cancer                                                                                                                          |     |      |            |
| Viner     | 2019 | Alberta's Tomorrow Project | adults aged 35-69 in Alberta, Canada who answered random digit dialing and had not been previously diagnosed with cancer, live in Alberta for 1 year, and speak English | Alberta, Canada | Prospective Cohort | Both   | 12.3 | 35 | 69 | Self-Report Questionnaire       | Incidence | Linkage with Alberta Cancer Registry                                                          |        | 2370 | 26607 | prostate cancer, breast cancer, endometrial cancer, colon cancer, lung cancer, leukemia, non-hodgkin lymphoma, hematological cancers |     |      |            |
| Lai       | 2019 |                            | lung cancer patients registered with the Kerman Cancer Registry                                                                                                         | Taiwan, China   | case-control       | Both   |      | 30 | 80 | self-administered questionnaire | Incidence | Histological confirmed cases                                                                  |        |      |       | lung cancer                                                                                                                          | 140 | 280  | Population |
| Jin       | 2019 |                            | histologically confirmed lung cancer patients from Queen Mary Hospital                                                                                                  | China           | case-control       | Female |      | 18 | 95 | self-administered questionnaire | Incidence | CDC-managed local cancer registries                                                           |        |      |       | lung cancer                                                                                                                          | 331 | 331  | Hospital   |
| Shimatani | 2020 |                            | Taiwan"                                                                                                                                                                 | Aichi, Japan    | case-control       | Both   |      | 35 | 81 | administered questionnaire      | Incidence | Histological confirmed cases                                                                  |        |      |       | Lung cancer                                                                                                                          | 132 | 132  | Hospital   |
| Hawrysz   | 2020 |                            | JFC study                                                                                                                                                               | Poland          | case-control       | Male   |      | 45 | 80 | self-administered questionnaire | Incidence | X-ray and CT confirmed                                                                        |        |      |       | lung cancer                                                                                                                          | 68  | 1808 | Population |

|        |      |                 |                                                                                                                                                              |                            |                    |        |    |    |    |                           |           |                              |        |       |        |                                                                                                                                                                                                                                                                                                                                                                    |  |  |  |
|--------|------|-----------------|--------------------------------------------------------------------------------------------------------------------------------------------------------------|----------------------------|--------------------|--------|----|----|----|---------------------------|-----------|------------------------------|--------|-------|--------|--------------------------------------------------------------------------------------------------------------------------------------------------------------------------------------------------------------------------------------------------------------------------------------------------------------------------------------------------------------------|--|--|--|
| Hansen | 2021 | NOWA C          | The Central Population Register selected a random sample of female according to the year of birth from University of Tromsø-The Arctic University of Norway. | Norway                     | Prospective Cohort | Female | 25 | 30 | 70 | Self-Report Questionnaire | Incidence | Clinical records             | 764512 | 1507  | 142508 | lung cancer                                                                                                                                                                                                                                                                                                                                                        |  |  |  |
| Weber  | 2021 | 45 and up study | adults enrolled in the 45 and up study living in New South Wales, Australia                                                                                  | New South Wales, Australia | Prospective Cohort | Both   | 10 | 45 | 99 | Self-Report Questionnaire | Incidence | Linkage with Cancer Registry |        | 18475 | 229028 | Lung, Myelodysplasia, Small intestine, Mesothelioma, Haematopoietic, Multiple Myeloma, Thyroid, Brain, Endometrium, NHL, Ovary, Melanoma, Breast (female), Prostate, Renal and Ureter, Myeloid, Leukaemia, Kidney, Colorectum, Stomach, Gallbladder and extrahepatic bile ducts, Head and Neck, Pancreas, Bladder, Unknown primary site, Oesophagus, Liver, Larynx |  |  |  |



|           |      |                                                |                                                                                                                                                                  |                |                    |        |     |    |    |                                 |           |                                                |           |      |         |             |     |     |        |
|-----------|------|------------------------------------------------|------------------------------------------------------------------------------------------------------------------------------------------------------------------|----------------|--------------------|--------|-----|----|----|---------------------------------|-----------|------------------------------------------------|-----------|------|---------|-------------|-----|-----|--------|
| Mezzoiuso | 2021 | FRiCAM multicenter cohort study                | all female 41-76 residing in Milan from 2003 to 2006 who had a mammogram                                                                                         | Italy          | Prospective Cohort | Female | 15  | 41 | 76 | Self-Report Questionnaire       | Incidence | Self-report diagnosis                          |           | 9487 | 75324   | Lung cancer |     |     |        |
| Park      | 2021 | Korean National Cancer Center Community Cohort | adults more than 20 years old diagnosed with any type of cancer                                                                                                  | South Korea    | Prospective Cohort | Both   | 23  | 20 | 90 | Self-Report Questionnaire       | Mortality | Clinical Records                               | 939852.65 | 173  | 8542    | Lung cancer |     |     |        |
| Jia       | 2021 | UK Biobank                                     | participants in the UK biobank study, adults from England, Scotland, and Wales between 40-69                                                                     | United Kingdom | Prospective Cohort | Both   | 5.8 | 40 | 69 | Self-Report Questionnaire       | Incidence | linkage with hospital records                  |           | 1779 | 308490  | Lung cancer |     |     |        |
| Huang     | 2021 |                                                | 2015) of China"                                                                                                                                                  | Taiwan, China  | case-control       | Both   |     | 20 | 80 | administered interview          | Incidence | Hospital records, diagnosed with ICD10 C33-C44 |           |      |         | Lung cancer |     |     |        |
| Rusmaully | 2021 |                                                | patients with lung cancer from Taichung Cheng Ching Hospital, Chung Shan Medical University, and Taichung Tungs' Taichung MetroHarbor Hospital in central Taiwan | France         | case-control       | Female |     | 18 | 75 | self-administered questionnaire | Incidence | diagnosis of primary cancer of the lung        |           |      |         | lung cancer | 237 | 474 | Varied |
| Zhang     | 2022 | UK Biobank                                     | participants in the UK biobank study, adults from England, Scotland, and Wales between 40-69                                                                     | United Kingdom | Prospective Cohort | Both   | 7.2 | 40 | 69 | Self-Report Questionnaire       | Incidence | Self-report diagnosis                          | 2,454,915 | 1687 | 344107  | Lung cancer |     |     |        |
| Guo       | 2022 | Cancer Screening Program in Urban China        | "40-74 years old residents (40-69 years old between 2012 and                                                                                                     | China          | Prospective Cohort | Both   | 8   | 40 | 79 | Self-Report Questionnaire       | Incidence | Clinical Records                               | 6,491,000 | 589  | 282,254 | Lung cancer |     |     |        |

|       |      |  |                                                                                                              |                  |              |      |  |    |    |                                 |           |                              |  |  |  |                           |     |     |            |
|-------|------|--|--------------------------------------------------------------------------------------------------------------|------------------|--------------|------|--|----|----|---------------------------------|-----------|------------------------------|--|--|--|---------------------------|-----|-----|------------|
| Huang | 2022 |  | adults with lung cancer in Tehran, Iran without suspected pulmonay metastases from a different primary tumor | Taiwan, China    | case-control | Both |  | 29 | 93 | administered interview          | Incidence | Pathologic confirmation      |  |  |  | Lung cancer               | 190 | 380 | Hospital   |
| Tse   | 2022 |  | WELCA study                                                                                                  | Hong Kong, China | case-control | Male |  | 35 | 79 | self-administered questionnaire | Incidence | Histological confirmed cases |  |  |  | lung cancer (ICD C33-C34) | 716 | 757 | Population |

**Supplementary Table 8: Study characteristics for all included studies, systolic blood pressure and ischemic heart disease**

In this presentation of the data, there is one row per study.

| Study name                                                      | Author and year of publication         | Population                                                                                                                                                                                  | Average follow-up | Age      | Endpoints               | Outcome definition                               | Intervention group                                   | Control group                                         |
|-----------------------------------------------------------------|----------------------------------------|---------------------------------------------------------------------------------------------------------------------------------------------------------------------------------------------|-------------------|----------|-------------------------|--------------------------------------------------|------------------------------------------------------|-------------------------------------------------------|
| ABCD-N                                                          | Schrier RW, et al, 2002                | Normotensive type 2 diabetic subjects identified from healthcare systems.                                                                                                                   | 5.3 years         | 40 to 74 | Incidence and mortality | Myocardial infarction and heart failure          | Nisoldipine or enalapril                             | Placebo                                               |
| ACCORD, Action to Control Cardiovascular Risk in Diabetes Study | ACCORD Study group, 2010               | High-risk participants with type 2 diabetes.                                                                                                                                                | 4.7 years         | 40 to 79 | Incidence and mortality | Myocardial infarction and coronary heart disease | Intensive therapy                                    | Standard therapy                                      |
| ACTION Trial                                                    | Poole-Wilson PA, 2004                  | Ambulatory patients diagnosed with angina pectoris with and without history of myocardial infarction.                                                                                       | 6 years           | 35 to 99 | Incidence and mortality | Myocardial infarction, angina and heart failure  | Nifedipine                                           | Placebo                                               |
| Active I                                                        | Active I Investigators, 2011           | Patients with atrial fibrillation and history of CVD or hypertension prior to the study.                                                                                                    | 4.1 years         | 75+      | Incidence and mortality | Myocardial infarction and heart failure          | Irbesartan 150 and 300 mg/d                          | Placebo                                               |
| ADVANCE                                                         | Patel A et al, 2007                    | Patients diagnosed with type 2 diabetes mellitus at the age of 30 years or older with history of major cardiovascular disease or at least one other risk factor for cardiovascular disease. | 5 years           | 55 to 76 | Incidence and mortality | Coronary heart disease                           | Perindopril 2 mg and indapamide 625 mg               | Placebo                                               |
| CAMELOT                                                         | Nissen SE et al, 2004                  | Individuals requiring coronary angiography for evaluation for chest pain or percutaneous coronary intervention with normal blood pressure and without treatment and without heart failure.  | 2 years           | 30 to 79 | Incidence and mortality | Myocardial infarction and angina                 | Amlodipine or enalapril                              | Placebo                                               |
| CARDIO-SIS                                                      | Verdecchia P et al, 2009 <sup>69</sup> | Patients with a systolic blood pressure of 150 mmHg or higher, receiving antihypertensive treatment for at least 12 weeks, without diabetes                                                 | 2 years           | 55+      | Incidence and mortality | Myocardial infarction and heart failure          | tight control (<130 mmHg) of systolic blood pressure | usual control (<140 mm Hg) of systolic blood pressure |
| DIABHYCAR                                                       | Marre M et al, 2004 <sup>52</sup>      | Individuals with type 2 diabetes that had urinary albumin excretion $\geq 20$ mg/l                                                                                                          | 4 years           | 52 to 78 | Incidence and mortality | Myocardial infarction and heart failure          | Ramipril                                             | Placebo                                               |

|                                                                                                                              |                                                     |                                                                                                                                                                                                                                                                                                                                         |           |          |                         |                                                                       |                                      |         |
|------------------------------------------------------------------------------------------------------------------------------|-----------------------------------------------------|-----------------------------------------------------------------------------------------------------------------------------------------------------------------------------------------------------------------------------------------------------------------------------------------------------------------------------------------|-----------|----------|-------------------------|-----------------------------------------------------------------------|--------------------------------------|---------|
| DREAM, Diabetes Reduction Assessment with ramipril and rosiglitazone Medication                                              | DREAM Trial Investigators, 2006 <sup>40</sup>       | People with impaired fasting plasma glucose or impaired glucose tolerance without diabetes or cardiovascular disease.                                                                                                                                                                                                                   | 3 years   | 30+      | Incidence and mortality | Myocardial infarction, heart failure and angina                       | Ramipril                             | Placebo |
| Dutch TIA                                                                                                                    | The Dutch TIA Trial Study Group, 1993 <sup>67</sup> | Patients who were seen by a neurologist in one of the 56 collaborating centers that had a TIA or nondisabling ischemic stroke.                                                                                                                                                                                                          | 2.7 years | 18+      | Incidence and mortality | Coronary heart disease                                                | Atenolol                             | Placebo |
| EUROPA, European trial on Reduction of cardiac events with Perindopril in patients with stable coronary artery disease study | Fox et al, 2003 <sup>41</sup>                       | Patients with evidence of coronary heart disease and without heart failure                                                                                                                                                                                                                                                              | 4.2 years | 45 to 75 | Incidence               | Myocardial infarction                                                 | Perindopril                          | Placebo |
| EWPHE, European Working Party on High Blood Pressure in the Elderly                                                          | Amery et al, 1985 <sup>34</sup>                     | Patients with systolic blood pressure within the limits 160-239 mmHg without CVD.                                                                                                                                                                                                                                                       | 4.6 years | 60+      | Mortality               | Coronary heart disease                                                | Hydrochlorothiazide + triamterene    | Placebo |
| FEVER Felodipine Event Reduction Study                                                                                       | Liu L et al, 2005 <sup>48</sup>                     | Individuals with systolic blood pressure of 210 mmHg or less and diastolic blood pressure less than 115 mmHg if under antihypertensive treatment; or systolic blood pressure between 160 and 210 mmHg or diastolic blood pressure between 95 and 115 mmHg if untreated.                                                                 | 3.3 years | 50 to 79 | Incidence and mortality | Coronary heart disease                                                | Felodipine                           | Placebo |
| HOPE-3, Heart Outcomes Prevention Evaluation study 3                                                                         | Lonn et al, 2016 <sup>49</sup>                      | Individuals without cardiovascular disease and with at least one of the following cardiovascular risk factors: elevated waist-to-hip ratio, history of low concentration of high-density lipoprotein cholesterol, current or recent tobacco use, dysglycemia, family history of premature coronary disease, and mild renal dysfunction; | 5.6 years | 55+      | Incidence and mortality | Myocardial infarction, heart failure and angina and revascularization | Candesartan plus hydrochlorothiazide | Placebo |

|                                                                                 |                                                                              |                                                                                                                                                                                                                                |           |          |                         |                                                                   |                                                                                                                       |                                                     |
|---------------------------------------------------------------------------------|------------------------------------------------------------------------------|--------------------------------------------------------------------------------------------------------------------------------------------------------------------------------------------------------------------------------|-----------|----------|-------------------------|-------------------------------------------------------------------|-----------------------------------------------------------------------------------------------------------------------|-----------------------------------------------------|
| HOPE, Heart Outcomes Prevention Evaluation study                                | Heart Outcomes Prevention Evaluation Study Investigators, 2000 <sup>44</sup> | Individuals with history of cardiovascular disease and/or diabetes plus at least one other cardiovascular risk factor (hypertension, elevated cholesterol levels, cigarette smoking, or microalbuminuria)                      | 5.6 years | 55+      | Incidence and mortality | Myocardial infarction                                             | Ramipril 2.5 mg                                                                                                       | Placebo                                             |
| HOT, Hypertension Optimal Treatment                                             | Hansson et al, 1998 <sup>43</sup>                                            | Patients with hypertension and diastolic blood pressure between 100 and 115 mmHg                                                                                                                                               | 3.8 years | 50 to 80 | Incidence and mortality | Myocardial infarction                                             | Diastolic control target less than 80 mmHg                                                                            | Placebo, diastolic control target less than 90 mmHg |
| HYVET                                                                           | Beckett et al, 2008 <sup>36</sup>                                            | Population with systolic blood pressure of 160 mmHg or more.                                                                                                                                                                   | 1.8 years | 80+      | Incidence and mortality | Myocardial infarction and heart failure                           | Indapamide 1.5 mg                                                                                                     | Placebo                                             |
| MRC 2 Medical Research Council trial of treatment of hypertension               | MRC Working Party, 1992 <sup>53</sup>                                        | Hypertensive older patients without history of myocardial infarction or stroke, diabetes, impaired renal function, within the preceding three months, had impaired renal function, asthma or any serious intercurrent disease. | 5.8 years | 65 to 74 | Incidence and mortality | Coronary heart disease                                            | Diuretic or beta-blocker (atenolol 50 mg/d; hydrochlorothiazide 25 mg/d or 50 mg/d plus amiloride 2.5 mg/d or 5 mg/d) | Placebo                                             |
| MRFIT, Multiple Risk Factor Intervention Trial*                                 | Stamler J et al, 1989 <sup>30</sup>                                          | Men who had no history of hospitalization for heart attack.                                                                                                                                                                    | 6 years   | 35 to 57 | Mortality               | Coronary heart disease                                            | NA*                                                                                                                   | NA*                                                 |
| NAVIGATOR                                                                       | NAVIGATOR Study Group, 2010 <sup>54</sup>                                    | Patients with impaired glucose tolerance, and one or more CVD risk factors or known CV disease                                                                                                                                 | 6.5 years | 53 to 74 | Incidence and mortality | Myocardial infarction, unstable angina and heart failure          | Valsartan                                                                                                             | Placebo                                             |
| PART 2 The Prevention of Atherosclerosis with Ramipril trial                    | MacMahon S et al, 2000 <sup>51</sup>                                         | Patients with hospital diagnosis (within five years of enrollment) or cardiovascular disease                                                                                                                                   | 4.7 years | 49 to 75 | Incidence and mortality | Coronary heart disease, myocardial infarction and unstable angina | Ramipril                                                                                                              | Placebo                                             |
| PATS Post-stroke Antihypertensive Treatment Study                               | Liu L et al, 2009 <sup>47</sup>                                              | Individuals with a history of stroke or transient ischemic attack                                                                                                                                                              | 2 years   | 47 to 73 | Incidence and mortality | Myocardial infarction                                             | Indapamide 2.5 mg daily                                                                                               | Placebo                                             |
| PEACE, Prevention of Events with Angiotensin Converting Enzyme Inhibition Trial | Braunwald et al, 2004 <sup>37</sup>                                          | Patients with stable coronary artery disease and normal or slightly reduced left ventricular function.                                                                                                                         | 4.8 years | 52 to 76 | Incidence               | Myocardial infarction                                             | Trandolapril 4 mg/d                                                                                                   | Placebo                                             |
| PHARAO                                                                          | Lüders S et al, 2008 <sup>50</sup>                                           | Internists and general practitioners with high-normal blood pressure.                                                                                                                                                          | 3 years   | 50 to 85 | Incidence and mortality | Myocardial infarction                                             | Ramipril 1.5 mg                                                                                                       | Placebo                                             |

|                                                                          |                                                     |                                                                                                                                                                                                             |           |          |                         |                                         |                                                                                                                                                                                          |                              |
|--------------------------------------------------------------------------|-----------------------------------------------------|-------------------------------------------------------------------------------------------------------------------------------------------------------------------------------------------------------------|-----------|----------|-------------------------|-----------------------------------------|------------------------------------------------------------------------------------------------------------------------------------------------------------------------------------------|------------------------------|
| PREVEND IT                                                               | Asselbergs et al, 2004 <sup>35</sup>                | Patients with angiographic evidence of coronary artery disease.                                                                                                                                             | 3 years   | 30 to 80 | Incidence and mortality | Myocardial infarction and angina        | Fosinopril 20 mg                                                                                                                                                                         | Placebo                      |
| PREVENT                                                                  | Pitt B et al, 2000 <sup>59</sup>                    | Patients who had angiographic evidence of coronary artery disease.                                                                                                                                          | 3 years   | 30 to 80 | Incidence and mortality | Myocardial infarction and angina        | Amlodipine                                                                                                                                                                               | Placebo                      |
| PRoFESS Prevention Regimen for Effectively Avoiding Second Strokes Study | Yusuf S, et al, 2008 <sup>70</sup>                  | Patients who had had an ischemic stroke less than 90 days before randomization and whose condition was stable.                                                                                              | 3 years   | 55+      | Incidence and mortality | Myocardial infarction                   | Telmisartan                                                                                                                                                                              | Placebo                      |
| PROGRESS The perindopril protection against recurrent stroke study       | PROGRESS Collaborative Group, 2001 <sup>61</sup>    | Individuals with a history of stroke or transient ischemic attack.                                                                                                                                          | 3.9 years | 49 to 79 | Incidence and mortality | Coronary heart disease                  | Perindopril 4 mg                                                                                                                                                                         | Placebo                      |
| PSC, Prospective Studies Collaboration*                                  | Lewington et al, 2002 <sup>*31</sup>                | Adults with no previous vascular disease recorded at baseline.                                                                                                                                              |           | 40 to 89 | Mortality               | Ischemic heart disease                  | NA                                                                                                                                                                                       | NA                           |
| RENAAL                                                                   | Brenner et al, 2001 <sup>38</sup>                   | Patients with type 2 diabetes and nephropathy.                                                                                                                                                              | 3.4 years | 31 to 70 | Incidence and mortality | Myocardial infarction and heart failure | Losartan                                                                                                                                                                                 | Placebo                      |
| SCOPE, Study on Cognition and Prognosis in the Elderly                   | Lithell et al, 2003 <sup>45</sup>                   | Patients with mild to moderate hypertension.                                                                                                                                                                | 3.7 years | 70 to 80 | Incidence and mortality | Myocardial infarction                   | candesartan 16 mg daily                                                                                                                                                                  | Placebo                      |
| SHEP Systolic Hypertension in the Elderly Program                        | SHEP Cooperative Research Group, 1984 <sup>63</sup> | Older population with isolated systolic hypertension.                                                                                                                                                       | 4.5 years | 60+      | Incidence and mortality | Coronary heart disease                  | For step 1 of the trial, dose 1 was chlorthalidone 12.5 mg/d, or matching placebo; dose 2 was 25 mg/d. For step 2, dose 1 was atenolol 25 mg/d, or matching placebo; dose 2 was 50 mg/d. | Placebo                      |
| SPRINT                                                                   | SPRINT Research Group, 2015 <sup>64</sup>           | Individuals with systolic blood pressure of 130-180 mmHg and an increased risk of CVD events.                                                                                                               | 3.3 years | 50+      | Incidence and mortality | Myocardial infarction                   | Intensive treatment                                                                                                                                                                      | Standard treatment           |
| SPS3 Secondary Prevention of Small Subcortical Strokes trial             | SPS3 Study Group, 2013 <sup>65</sup>                | Individuals who had had a recent (within 180 days), symptomatic, MRI-confirmed lacunar stroke, and were without surgically amenable ipsilateral carotid artery stenosis or high-risk cardioembolic sources. | 3.7 years | 30+      | Incidence and mortality | Myocardial infarction                   | Lower target <130 mmHg                                                                                                                                                                   | higher target (130-149 mmHg) |

|                                                                  |                                                         |                                                                                                                                             |            |          |                         |                        |                                                                                                                                                                                                                              |                                                                              |
|------------------------------------------------------------------|---------------------------------------------------------|---------------------------------------------------------------------------------------------------------------------------------------------|------------|----------|-------------------------|------------------------|------------------------------------------------------------------------------------------------------------------------------------------------------------------------------------------------------------------------------|------------------------------------------------------------------------------|
| STOP-Hypertension                                                | Dahlöf et al, 1991 <sup>39</sup>                        | Untreated patients with systolic blood pressure of 180 mmHg or above or diastolic pressure above 105 mmHg irrespective.                     | 2 years    | 70 to 82 | Incidence and mortality | Myocardial infarction  | Atenolol 50 mg, hydrochlorothiazide 25 mg plus amiloride 2-5 mg, metoprolol 100 mg, or pindolol 5 mg.                                                                                                                        | Placebo                                                                      |
| Syst-China                                                       | Liu L et al, 1998 <sup>46</sup>                         | Older patients with isolated systolic hypertension and without cardiovascular disease                                                       | 3 years    | 60+      | Incidence and mortality | Coronary heart disease | lirendipine, with the possible addition of captopril, hydrochlorothiazide, or both                                                                                                                                           | Placebo                                                                      |
| The BBB Study                                                    | Hansson et al, 1994 <sup>42</sup>                       | Treated hypertensive patients with diastolic blood pressure of 90-100 mmHg and without history or clinical signs of coronary heart disease. | 5 years    | 45 to 67 | Incidence and mortality | Myocardial infarction  | Intensified treatment                                                                                                                                                                                                        | Unchanged treatment to maintain diastolic blood pressure in the range 90-100 |
| TOMHS                                                            | Neaton JD, et al, 1993 <sup>55</sup>                    | Individuals not taking antihypertensive medication with diastolic blood pressure between 90 and 99 mmHg.                                    | 4.4 years  | 45 to 69 | Incidence and mortality | Coronary heart disease | Nutritional-hygienic intervention + one of the following: placebo; chlorthalidone 15 mg/d; acebutolol 400 mg/d; doxazosin mesylate 1 mg/d for 1 month, then 2 mg/d; amlodipine maleate 5 mg/d; or enalapril maleate 5 mg/ d. | Placebo                                                                      |
| TRANSCEND, Telmisartan Randomized Assessment Study               | TRANSCEND Investigators, 2008 <sup>66</sup>             | ACE intolerant subjects with cardiovascular disease.                                                                                        | 4.7 years  | 55+      | Incidence and mortality | Myocardial infarction  | telmisartan 80 mg/day                                                                                                                                                                                                        | Placebo                                                                      |
| UKPDS UK Prospective Diabetes Study (UKPDS 38)                   | UK Prospective Diabetes Study Group, 1999 <sup>68</sup> | Hypertensive patients with type 2 diabetes without history of myocardial infarction in the previous year; current angina or heart failure.  | 8.4 years  | 25+      | Incidence and mortality | Myocardial infarction  | Angiotensin converting enzyme inhibitor to maximal doses or beta blocker to maximal doses                                                                                                                                    | Avoid angiotensin converting enzyme inhibitors and beta blockers             |
| VALISH Valsartan in Elderly Isolated Systolic Hypertension Study | Ogihara T et al, 2010 <sup>57</sup>                     | Patients with isolated systolic hypertension.                                                                                               | 3.07 years | 70 to 84 | Incidence and mortality | Myocardial infarction  | Valsartan                                                                                                                                                                                                                    | Valsartan                                                                    |

**Supplementary Table 9: Study characteristics for all included studies, vegetables and ischemic heart disease**

In this presentation of the data, there is one row per study. Both = males + females, or all sexes, depending on study.

| Author       | Year | Study name                               | Population                                                                                                                                                                                    | Location                              | Study design       | Sex    | Follow-up | Age start | Age end | Exposure assessment | Endpoint              | Disease ascertainment                                | Events | Sample size |
|--------------|------|------------------------------------------|-----------------------------------------------------------------------------------------------------------------------------------------------------------------------------------------------|---------------------------------------|--------------------|--------|-----------|-----------|---------|---------------------|-----------------------|------------------------------------------------------|--------|-------------|
| Bhupathiraju | 2013 | Nurses' Health Study                     | US female registered nurses                                                                                                                                                                   | United States                         | Prospective cohort | Female | 24        | 30        | 55      | FFQ                 | Incidence             | Administrative medical records or disease registries | 2582   | 113276      |
| Bhupathiraju | 2013 | Health Professionals Follow-Up study     | US male health professionals                                                                                                                                                                  | United States                         | Prospective cohort | Male   | 22        | 40        | 75      | FFQ                 | Incidence             | Administrative medical records or disease registries | 3607   | 113276      |
| Dauchet      | 2010 | PRIME study                              | Four WHO-MONICA centers in Belfast (UK), Lille (Northern France), Strasbourg (Eastern France) and Toulouse (Southwestern France).                                                             | France and Northern Ireland           | Prospective cohort | Male   | 10        | 50        | 59      | FFQ                 | Incidence & Mortality | Administrative medical records or disease registries | 367    | 2297        |
| Dauchet      | 2010 | PRIME study                              | Four WHO-MONICA centers in Belfast (UK), Lille (Northern France), Strasbourg (Eastern France) and Toulouse (Southwestern France).                                                             | France and Northern Ireland           | Prospective cohort | Male   | 10        | 50        | 59      | FFQ                 | Incidence & Mortality | Administrative medical records or disease registries | 367    | 2410        |
| Dauchet      | 2010 | PRIME study                              | Four WHO-MONICA centers in Belfast (UK), Lille (Northern France), Strasbourg (Eastern France) and Toulouse (Southwestern France).                                                             | France and Northern Ireland           | Prospective cohort | Male   | 10        | 50        | 59      | FFQ                 | Incidence & Mortality | Administrative medical records or disease registries | 367    | 3353        |
| Hansen       | 2010 | Danish Diet, Cancer, and Health Study    | All men and women aged 50 to 64 years, born in Denmark, living in the greater areas of Aarhus or Copenhagen, and with no previous cancer diagnosis in the Danish Cancer Registry were invited | Denmark                               | Prospective cohort | Male   | 7.7       | 50        | 64      | FFQ                 | Incidence & Mortality | Administrative medical records or disease registries | 820    | 25065       |
| Hansen       | 2010 | Danish Diet, Cancer, and Health Study    | All men and women aged 50 to 64 years, born in Denmark, living in the greater areas of Aarhus or Copenhagen, and with no previous cancer diagnosis in the Danish Cancer Registry were invited | Denmark                               | Prospective cohort | Female | 7.7       | 50        | 64      | FFQ                 | Incidence & Mortality | Administrative medical records or disease registries | 255    | 28318       |
| Knekt        | 1994 | Finnish Mobile Health Clinic             | Adult men and women from rural, urban, and industrial communities in Finland                                                                                                                  | Finland                               | Prospective cohort | Female | 14        | 30        | 69      | FFQ                 | Mortality             | Death certificates                                   | 244    | 2385        |
| Knekt        | 1994 | Finnish Mobile Health Clinic             | Adult men and women from rural, urban, and industrial communities in Finland                                                                                                                  | Finland                               | Prospective cohort | Male   | 14        | 30        | 69      | FFQ                 | Mortality             | Death certificates                                   | 244    | 2748        |
| Kobylecki    | 2015 | CGPS and the Copenhagen City Heart Study | Individuals aged 20–100 y were invited randomly from the Danish Civil Registration System                                                                                                     | Denmark                               | Prospective cohort | Both   | 21        | 20        | 100     | FFQ                 | Incidence             | Administrative medical records or disease registries | 2823   | 97203       |
| Liu          | 2000 | Womens' Health Study                     | Female health professionals who were without heart disease, stroke, or cancer (other than nonmelanoma skin cancer) at baseline.                                                               | United States                         | Prospective cohort | Female | 5         | 40        | 68      | FFQ                 | Incidence & Mortality | Self-report                                          | 126    | 39876       |
| Miller       | 2017 | PURE                                     | 613 communities in 18 low-income, middle-income, and high-income countries (HIC) in seven geographical                                                                                        | United Arab Emirates, Canada, Sweden, | Prospective cohort | Both   | 7.4       | 35        | 70      | FFQ                 | Incidence             | Physician diagnosis                                  | 2143   | 135335      |



|               |      |                                                              |                                                                                                                                                                                                                      |                                                                                                                                                               |                    |        |      |    |    |                    |                       |                                                      |      |        |
|---------------|------|--------------------------------------------------------------|----------------------------------------------------------------------------------------------------------------------------------------------------------------------------------------------------------------------|---------------------------------------------------------------------------------------------------------------------------------------------------------------|--------------------|--------|------|----|----|--------------------|-----------------------|------------------------------------------------------|------|--------|
|               |      |                                                              | regions: North America and Europe, South America, the Middle East, south Asia, China, southeast Asia, and Africa.                                                                                                    | Poland, Argentina, Chile, Malasia, Turkey, Iran, Occupied Palestinian territory, Brazil, South Africa, Columbia, China, India, Pakistan, Bangladesh, Zimbabwe |                    |        |      |    |    |                    |                       |                                                      |      |        |
| Perez-Cornago | 2021 | European Prospective Investigation into Cancer and Nutrition | Men and women recruited through 23 centers in 10 European countries (Denmark, France, Germany, Greece, Italy, The Netherlands, Norway, Spain, Sweden and the UK)                                                     | Denmark, France, Germany, Greece, Italy, The Netherlands, Norway, Spain, Sweden and the UK                                                                    | Prospective cohort | Female | 12.6 | 35 | 70 | FFQ                | Incidence & Mortality | Administrative medical records or disease registries | 8504 | 490311 |
| Pietinen      | 1996 | Alpha-Tocopherol, Beta-Carotene Cancer Prevention Study      | Male smokers recruited from 14 geographic areas in southwestern Finland                                                                                                                                              | Finland                                                                                                                                                       | Prospective cohort | Male   | 6.1  | 50 | 69 | FFQ                | Incidence & Mortality | Administrative medical records or disease registries | 1399 | 29133  |
| Rebello       | 2014 | Singapore Chinese Health Study                               | Singapore citizens or permanent residents aged between 45-74 y who were residing at public housing estates                                                                                                           | Singapore                                                                                                                                                     | Prospective cohort | Female | 15   | 45 | 74 | FFQ                | Mortality             | Administrative medical records or disease registries | 638  | 29968  |
| Rebello       | 2014 | Singapore Chinese Health Study                               | Singapore citizens or permanent residents aged between 45-74 y who were residing at public housing estates                                                                                                           | Singapore                                                                                                                                                     | Prospective cohort | Male   | 15   | 45 | 74 | FFQ                | Mortality             | Administrative medical records or disease registries | 1022 | 23501  |
| Sharma        | 2014 | MEC study                                                    | Large representative samples of five ethnic groups in the United States; Caucasian, African American, Native Hawaiian, Japanese American, and Latino.                                                                | United States                                                                                                                                                 | Prospective cohort | Male   | 8    | 45 | 75 | FFQ                | Mortality             | Administrative medical records or disease registries | 1140 | 72866  |
| Sharma        | 2014 | MEC study                                                    | Large representative samples of five ethnic groups in the United States; Caucasian, African American, Native Hawaiian, Japanese American, and Latino.                                                                | United States                                                                                                                                                 | Prospective cohort | Female | 8    | 45 | 75 | FFQ                | Mortality             | Administrative medical records or disease registries | 811  | 91940  |
| Sonestedt     | 2015 | Malmö Diet and Cancer Study                                  | All men born between 1923 and 1945 and women born between 1923 and 1950 that live in Malmö were invited via personal letters and advertisements in the local newspaper and public places to participate in the study | Sweden                                                                                                                                                        | Prospective cohort | Both   | 14   | 44 | 74 | 7-day diet history | Incidence & Mortality | Administrative medical records or disease registries | 2921 | 26445  |
| Stefler       | 2016 | HAPIEE study                                                 | Middle-aged men and women, randomly selected from population/electoral registers in Krakow (Poland), Novosibirsk (Russia) and six cities of the Czech Republic                                                       | Czech Republic, Poland and Russia                                                                                                                             | Prospective cohort | Both   | 7.1  | 43 | 71 | FFQ                | Mortality             | Administrative medical records or disease registries | 226  | 19333  |

|           |      |                                                    |                                                                                                                                                            |                |                    |        |      |    |    |                |                       |                                                      |       |        |
|-----------|------|----------------------------------------------------|------------------------------------------------------------------------------------------------------------------------------------------------------------|----------------|--------------------|--------|------|----|----|----------------|-----------------------|------------------------------------------------------|-------|--------|
| Tognon    | 2014 | MONICA                                             | Randomly selected from the Central Person Register of citizens born in 1922, 1932, 1942 and 1952 living in eleven municipalities in the Copenhagen County. | Denmark        | Prospective cohort | Both   | 14   | 30 | 85 | 7d food record | Incidence & Mortality | Administrative medical records or disease registries | 161   | 1849   |
| Yoshizaki | 2020 | Japan Public Health Center-Based Prospective Study | Residents of the Okinawa Prefecture (two PHC areas: Chubu from Cohort I and Miyako from Cohort II)                                                         | Japan          | Prospective cohort | Male   | 13.2 | 40 | 74 | FFQ            | Incidence & Mortality | Administrative medical records or disease registries | 147   | 7726   |
| Yoshizaki | 2020 | Japan Public Health Center-Based Prospective Study | Residents of the Okinawa Prefecture (two PHC areas: Chubu from Cohort I and Miyako from Cohort II)                                                         | Japan          | Prospective cohort | Female | 13.2 | 40 | 74 | FFQ            | Incidence & Mortality | Administrative medical records or disease registries | 32    | 8772   |
| Yu        | 2014 | Shanghai Women's Health Study (SWHS)               | Participants from the Shanghai Women's Health Study (SWHS) and the Shanghai Men's Health Study (SMHS)                                                      | China          | Prospective cohort | Female | 9.8  | 40 | 70 | FFQ            | Incidence             | Physician diagnosis                                  | 148   | 67211  |
| Yu        | 2014 | Shanghai Men's Health Study (SMHS)                 | Participants from the Shanghai Women's Health Study (SWHS) and the Shanghai Men's Health Study (SMHS)                                                      | China          | Prospective cohort | Male   | 5.4  | 40 | 74 | FFQ            | Incidence             | Physician diagnosis                                  | 217   | 55474  |
| Zhang     | 2021 | UK Biobank study                                   | CVD-free participants aged 40-69y                                                                                                                          | United Kingdom | Prospective cohort | Female | 11.2 | 40 | 69 | FFQ            | Incidence             | Administrative medical records or disease registries | 11161 | 462155 |

**Supplementary Table 10: Study characteristics for all included studies, unprocessed red meat and ischemic heart disease**

In this presentation of the data, there is one row per study. Both = males + females, or all sexes, depending on study.

| Report         | Study name                                                          | Population                                                                                                                                                                            | Location                                                                               | Study design       | Sex   | Follow-up | Age start | Age end | Exposure assessment  | Endpoint              | Disease ascertainment                                | Person-years | Events | Sample size |
|----------------|---------------------------------------------------------------------|---------------------------------------------------------------------------------------------------------------------------------------------------------------------------------------|----------------------------------------------------------------------------------------|--------------------|-------|-----------|-----------|---------|----------------------|-----------------------|------------------------------------------------------|--------------|--------|-------------|
| Al-Shaar 2020  | Health Professionals Follow-Up Study                                | US male health professionals                                                                                                                                                          | United States                                                                          | Prospective cohort | men   | 30        | 40        | 75      | FFQ                  | Incidence             | Administrative medical records or disease registries | 1023872      | 4456   | 43272       |
| Bernstein 2010 | Nurses' Health Study                                                | US female registered nurses                                                                                                                                                           | United States                                                                          | Prospective cohort | women | 26        | 30        | 55      | FFQ                  | Incidence & mortality | Administrative medical records or disease registries | 2050071      | 3162   | 84136       |
| Fraser* 1999   | Adventist Health Study                                              | non-Hispanic white California Seventh-day Adventists and others living in Adventist households                                                                                        | California, United States                                                              | Prospective cohort | both  | 6         | 25+       |         | surveillance program | Mortality             | Administrative medical records or disease registries | 180000       | 2716   | 34198       |
| Haring 2014    | Atherosclerosis Risk in Communities Study (ARIC)                    | community-based prospective cohort study of middle-aged adults from four US communities (Washington County, Md; Forsyth County, NC; Jackson, Miss; and suburbs of Minneapolis, Minn.) | United States                                                                          | Prospective cohort | both  | 22        | 45        | 64      | FFQ                  | Incidence & mortality | Death certificates                                   | 233688       | 1147   | 12066       |
| Key 2019       | European Prospective Investigation into Cancer and Nutrition (EPIC) | volunteers (mostly ages 25–70 years) from 23 centres in ten countries (Sweden, Denmark, Norway, The Netherlands, UK, France, Germany, Spain, Italy and Greece)                        | Sweden, Denmark, Norway, The Netherlands, UK, France, Germany, Spain, Italy and Greece | Prospective cohort | both  | 12.6      | mean(sd)  | 52(10)  | FFQ                  | Incidence             | Administrative medical records or disease registries | 5164551      | 7193   | 409885      |
| Möller 2021    | Danish National Survey on Diet and Physical Activity                | Non-institutionalised Danish citizens without IHD at baseline                                                                                                                         | Denmark                                                                                | Prospective cohort | both  | 9.8       | 15        | 75      | Food diary           | Incidence             | Administrative medical records or disease registries | 77214.51     | 439    | 8007        |
| Nagao 2012     | Japan Collaborative Cohort Study                                    | People enrolled from 45 communities across Japan                                                                                                                                      | Japan                                                                                  | Prospective cohort | both  | 18.4      | 40        | 79      | FFQ                  | Mortality             | Death certificates                                   | 820075       | 537    | 51683       |
| Papier 2021    | UK BIOBANK                                                          | UK volunteers, with no history of cancer except non-melanoma skin cancer                                                                                                              | United Kingdom                                                                         | Prospective cohort | both  | 8         | 37        | 73      | 24DR                 | Incidence             | Administrative medical records or disease registries | 3449832      | 13134  | 431229      |
| Takata 2013    | Shanghai Men's Health study                                         | Men residing in urban areas of Shanghai                                                                                                                                               | Shanghai                                                                               | Prospective cohort | men   | 5.5       | 40        | 74      | FFQ                  | Mortality             | Administrative medical records or disease registries | 334281       | 306    | 61128       |
| Takata 2013    | Shanghai Women's Health Study                                       | Women residing in urban areas of Shanghai                                                                                                                                             | Shanghai                                                                               | Prospective cohort | women | 11.2      | 40        | 70      | FFQ                  | Mortality             | Administrative medical records or disease registries | 803265       | 306    | 73162       |
| Whiteman 1999  | OXCHECK Study                                                       | Patients registered with five urban practices around Luton and Dunstable (Bedfordshire, UK)                                                                                           | United Kingdom                                                                         | Prospective cohort | both  | 9         | 35        | 64      | FFQ                  | Mortality             | Administrative medical records or disease registries | 5586         | 94     | 10522       |

**Supplementary Table 11: Study quality for all included studies, smoking and lung cancer**

In this presentation of the data, there is one row per study.

| Author       | Year | Study design        | Location          | cv_adj_L0 | cv_adj_L1 | cv_adj_L2 | cv_exposure_study | cv_older | cv_subpopulation | Quality score |
|--------------|------|---------------------|-------------------|-----------|-----------|-----------|-------------------|----------|------------------|---------------|
| Liu          | 1991 | Case-control        | China             | 1         | 0         | 0         | 1                 | 0        | 1                | 3             |
| Brownson     | 1987 | Case-control        | United States     | 1         | 1         | 0         | 1                 | 0        | 1                | 4             |
| Marugame     | 2005 | Prospective cohort  | Japan             | 1         | 0         | 0         | 1                 | 0        | 1                | 3             |
| Dikshit      | 2000 | Case-control        | India             | 1         | 1         | 0         | 1                 | 0        | 1                | 4             |
| Dosemeci     | 1997 | Case-control        | Turkey            | 1         | 0         | 0         | 1                 | 0        | 1                | 3             |
| Freedman     | 2015 | Prospective cohort  | United States     | 1         | 0         | 0         | 1                 | 0        | 1                | 3             |
| Bae          | 2013 | Prospective cohort  | Republic of Korea | 1         | 0         | 0         | 1                 | 0        | 1                | 3             |
| Liaw         | 1998 | Prospective cohort  | Taiwan            | 1         | 1         | 0         | 0                 | 0        | 0                | 2             |
| Everatt      | 2014 | Prospective cohort  | Lithuania         | 1         | 0         | 0         | 1                 | 0        | 0                | 2             |
| Nordlund     | 1999 | Prospective cohort  | Sweden            | 1         | 1         | 0         | 1                 | 0        | 0                | 3             |
| Siemiatycki  | 1995 | case-control        | Quebec, Canada    | 0         | 0         | 0         | 1                 | 0        | 1                | 2             |
| Siemiatycki  | 1995 | case-control        | Quebec, Canada    | 1         | 1         | 1         | 1                 | 0        | 0                | 4             |
| Chyou        | 1992 | Prospective cohort  | United States     | 1         | 1         | 0         | 1                 | 0        | 1                | 4             |
| Potter       | 1991 | Nested case-control | United States     | 1         | 1         | 1         | 1                 | 1        | 1                | 6             |
| Chyou        | 1993 | Prospective cohort  | United States     | 1         | 1         | 0         | 1                 | 0        | 1                | 4             |
| Pesch        | 2012 | Pooled case-control | Europe, Canada    | 1         | 0         | 0         | 1                 | 0        | 1                | 3             |
| Jockel       | 1992 | Case-control        | Germany           | 1         | 1         | 0         | 1                 | 0        | 1                | 4             |
| Jockel       | 1997 | Case-control        | Germany           | 1         | 0         | 0         | 1                 | 0        | 1                | 3             |
| De Stefani   | 1996 | Case-control        | Uruguay           | 1         | 0         | 0         | 1                 | 0        | 1                | 3             |
| Lei          | 1996 | Case-control        | China             | 1         | 1         | 0         | 1                 | 0        | 1                | 4             |
| Pawlega      | 1997 | Case-control        | Poland            | 0         | 0         | 0         | 1                 | 0        | 1                | 2             |
| Wunsch-Filho | 1998 | Case-control        | Brazil            | 1         | 1         | 0         | 1                 | 0        | 1                | 4             |
| Mao          | 2001 | Case-control        | Canada            | 1         | 0         | 0         | 1                 | 0        | 1                | 3             |
| Barbone      | 1997 | Case-control        | Italy             | 1         | 1         | 0         | 1                 | 0        | 1                | 4             |
| Matos        | 1998 | Case-control        | Argentina         | 1         | 1         | 0         | 1                 | 0        | 1                | 4             |

|                  |      |                     |                                                       |   |   |   |   |   |   |   |
|------------------|------|---------------------|-------------------------------------------------------|---|---|---|---|---|---|---|
| De Stefani       | 1998 | Case-control        | Uruguay                                               | 1 | 0 | 0 | 1 | 0 | 1 | 3 |
| Simonato         | 2001 | Pooled case-control | Sweden, Germany, United Kingdom, France, Spain, Italy | 1 | 0 | 0 | 1 | 0 | 0 | 2 |
| Risch            | 1993 | Case-control        | Canada                                                | 1 | 1 | 0 | 1 | 0 | 1 | 4 |
| Sankaranarayanan | 1994 | Case-control        | India                                                 | 1 | 1 | 1 | 1 | 0 | 1 | 5 |
| Band             | 1999 | Nested case-control | Canada                                                | 1 | 1 | 0 | 1 | 0 | 1 | 4 |
| Becher           | 1991 | Case-control        | Germany                                               | 1 | 1 | 0 | 1 | 0 | 1 | 4 |
| Brockmoller      | 1993 | Case-control        | Germany                                               | 1 | 1 | 1 | 1 | 0 | 1 | 5 |
| Vena             | 1985 | Case-control        | United States                                         | 1 | 1 | 0 | 1 | 0 | 1 | 4 |
| Cascorbi         | 1996 | Case-control        | Germany                                               | 1 | 1 | 0 | 1 | 0 | 1 | 4 |
| Chiazze          | 1992 | Nested case-control | United States                                         | 1 | 1 | 1 | 1 | 0 | 1 | 5 |
| Ando             | 2003 | Prospective cohort  | Japan                                                 | 1 | 1 | 0 | 1 | 0 | 0 | 3 |
| De Matteis       | 2012 | Case-control        | Italy                                                 | 1 | 0 | 0 | 1 | 0 | 1 | 3 |
| He               | 2013 | Prospective cohort  | China                                                 | 0 | 0 | 0 | 0 | 1 | 1 | 2 |
| Nishino          | 2004 | Prospective cohort  | Japan                                                 | 0 | 0 | 0 | 1 | 0 | 1 | 2 |
| Papadopoulos     | 2011 | Case-control        | France                                                | 0 | 0 | 0 | 1 | 0 | 1 | 2 |
| Shimazu          | 2008 | Prospective cohort  | Japan                                                 | 0 | 0 | 0 | 1 | 0 | 1 | 2 |
| Tindle           | 2018 | Prospective cohort  | United States                                         | 1 | 1 | 1 | 1 | 0 | 1 | 5 |
| Yong             | 1997 | Prospective cohort  | United States                                         | 1 | 1 | 1 | 1 | 0 | 0 | 4 |
| Hansen           | 2017 | Prospective cohort  | Norway                                                | 1 | 0 | 0 | 1 | 0 | 0 | 2 |
| Boffetta         | 2010 | Pooled case-control | United States                                         | 1 | 0 | 0 | 1 | 0 | 1 | 3 |
| Yun              | 2015 | Prospective cohort  | Republic of Korea                                     | 0 | 0 | 0 | 1 | 0 | 1 | 2 |
| Suzuki           | 1994 | Case-control        | Brazil                                                | 1 | 1 | 1 | 1 | 0 | 1 | 5 |
| De Stefani       | 1996 | Case-control        | Uruguay                                               | 0 | 0 | 0 | 1 | 0 | 1 | 2 |
| Hu               | 1997 | Case-control        | China                                                 | 1 | 0 | 0 | 1 | 0 | 1 | 3 |
| Kreuzer          | 1998 | Case-control        | Germany                                               | 1 | 0 | 0 | 1 | 1 | 1 | 4 |
| Kreuzer          | 1998 | Case-control        | Germany                                               | 1 | 0 | 0 | 1 | 0 | 1 | 3 |

|                    |      |                    |                   |   |   |   |   |   |   |   |
|--------------------|------|--------------------|-------------------|---|---|---|---|---|---|---|
| Armadans           | 1999 | Case-control       | Spain             | 1 | 1 | 0 | 1 | 0 | 1 | 4 |
| Kubik              | 2002 | Case-control       | Czechia           | 1 | 0 | 0 | 1 | 0 | 1 | 3 |
| Rachtan            | 2001 | Case-control       | Poland            | 1 | 1 | 0 | 1 | 0 | 1 | 4 |
| Thun               | 2013 | Prospective cohort | United States     | 1 | 0 | 0 | 1 | 0 | 1 | 3 |
| Thun               | 2013 | Prospective cohort | United States     | 1 | 0 | 0 | 1 | 0 | 0 | 2 |
| Zatloukal          | 2003 | case-control       | Czech Republic    | 1 | 1 | 0 | 1 | 0 | 1 | 4 |
| Hansen             | 2021 | Prospective Cohort | Norway            | 1 | 0 | 0 | 0 | 0 | 0 | 1 |
| Zhang              | 2022 | Prospective Cohort | United Kingdom    | 0 | 0 | 0 | 1 | 0 | 0 | 1 |
| Weber              | 2021 | Prospective Cohort | Australia         | 0 | 0 | 0 | 1 | 0 | 0 | 1 |
| Guo                | 2022 | Prospective Cohort | China             | 1 | 1 | 1 | 1 | 0 | 0 | 4 |
| Mezzoiuso          | 2021 | Prospective Cohort | Italy             | 1 | 0 | 0 | 1 | 0 | 0 | 2 |
| Hawrysz            | 2020 | case-control       | Poland            | 1 | 1 | 0 | 1 | 0 | 0 | 3 |
| Huang              | 2021 | case-control       | Taiwan, China     | 1 | 1 | 0 | 1 | 0 | 0 | 3 |
| Viner              | 2019 | Prospective Cohort | Canada            | 0 | 0 | 0 | 1 | 0 | 1 | 2 |
| Park               | 2021 | Prospective Cohort | Republic of Korea | 0 | 0 | 0 | 1 | 0 | 0 | 1 |
| Jia                | 2021 | Prospective Cohort | United Kingdom    | 1 | 1 | 1 | 1 | 0 | 0 | 4 |
| Rusmaully          | 2021 | case-control       | France            | 1 | 0 | 0 | 1 | 0 | 0 | 2 |
| Jin                | 2019 | case-control       | China             | 1 | 1 | 1 | 1 | 0 | 1 | 5 |
| Tse                | 2022 | case-control       | China             | 1 | 1 | 1 | 1 | 0 | 1 | 5 |
| Huang              | 2022 | case-control       | Taiwan, China     | 1 | 0 | 0 | 1 | 0 | 1 | 3 |
| Hosseini           | 2009 | case-control       | Iran              | 0 | 0 | 0 | 1 | 0 | 1 | 2 |
| Naghibzadeh-Tahami | 2010 | case-control       | Iran              | 1 | 0 | 0 | 1 | 0 | 1 | 3 |
| Shimatani          | 2020 | case-control       | Japan             | 1 | 1 | 1 | 1 | 0 | 1 | 5 |
| Lai                | 2019 | case-control       | Taiwan, China     | 1 | 0 | 0 | 1 | 0 | 1 | 3 |
| Schwartz           | 2015 | case-control       | Brazil            | 1 | 1 | 1 | 1 | 0 | 1 | 5 |
| Schwartz           | 2015 | case-control       | Brazil            | 1 | 1 | 1 | 1 | 0 | 0 | 4 |
| Kreuzer            | 2003 | case-control       | Germany           | 1 | 1 | 1 | 1 | 0 | 1 | 5 |
| Sreeja             | 2005 | case-control       | India             | 1 | 1 | 0 | 1 | 0 | 0 | 3 |
| Siemiatycki        | 1994 | case-control       | Quebec, Canada    | 1 | 1 | 1 | 1 | 0 | 0 | 4 |

|            |      |              |       |   |   |   |   |   |   |   |
|------------|------|--------------|-------|---|---|---|---|---|---|---|
| Chan-Yeung | 2003 | case-control | China | 1 | 1 | 1 | 1 | 0 | 1 | 5 |
| Lawania    | 2017 | case-control | India | 1 | 1 | 1 | 1 | 1 | 1 | 6 |

cv\_subpopulation: 0 for risk estimates are likely generalizable to the general population because the sample was based on the general population with reasonable exclusions for pre-existing disease states; 1 for risk estimates of sub-groups such as high-risk groups

cv\_adj\_L0, cv\_adj\_L1, cv\_adj\_L2: cascading dummy variables for adjustmalet level of the risk estimates (i.e., how many confounders are adjusted for in the regression model for the risk estimate). There are four adjustmalet levels, namely, 1.no adjustmalet, 2.only adjusting for age and sex, 3.adjusting for age and sex and <= 3 other covariates, and 4.adjusting for age and sex and > 3 other covariates. If the adjustmalet level is 1, cv\_adj\_L0=1, cv\_adj\_L1=1, cv\_adj\_L2=1; if the adjustmalet level is 2, cv\_adj\_L0=1, cv\_adj\_L1=1, cv\_adj\_L2=0; if the adjustmalet level is 3, then cv\_adj\_L0=1, cv\_adj\_L1=0, cv\_adj\_L2=0; if the adjustmalet level is 4, then cv\_adj\_L0=0, cv\_adj\_L1=0, cv\_adj\_L2=0.

cv\_exposure\_study: 0 for exposure measured multiple times and 1 for exposure measured only at baseline

cv\_older: 0 if the population contains both young and old people; 1 if the population only contains old people above 65 years old.

**Supplementary Table 12: Study quality for all included studies, systolic blood pressure and ischemic heart disease**

In this presentation of the data, there is one row per study.

| <b>Author</b>                                            | <b>Year</b> | <b>Exposure Measurement Score (multiple-0, single-1)</b> | <b>Exposure Assessment Score (objective-0 vs self-report-1)</b> | <b>Outcome Assessment Score (objective-0 vs self-report-1)</b> | <b>Confounders Score (age, sex, smoking, income, education-0, age, sex, smoking-1, age, sex-2)</b> | <b>Quality Score (best-0, worst-5)</b> |
|----------------------------------------------------------|-------------|----------------------------------------------------------|-----------------------------------------------------------------|----------------------------------------------------------------|----------------------------------------------------------------------------------------------------|----------------------------------------|
| ACCORD Study group                                       | 2010        | 0                                                        | 0                                                               | 0                                                              | 0                                                                                                  | 0                                      |
| Active I Investigators                                   | 2011        | 0                                                        | 0                                                               | 0                                                              | 0                                                                                                  | 0                                      |
| Amery, et al.                                            | 1985        | 0                                                        | 0                                                               | 0                                                              | 0                                                                                                  | 0                                      |
| Asselbergs, et al.                                       | 2004        | 0                                                        | 0                                                               | 0                                                              | 0                                                                                                  | 0                                      |
| Beckett, et al.                                          | 2008        | 0                                                        | 0                                                               | 0                                                              | 0                                                                                                  | 0                                      |
| Braunwald, et al.                                        | 2004        | 0                                                        | 0                                                               | 0                                                              | 0                                                                                                  | 0                                      |
| Brenner, et al.                                          | 2001        | 0                                                        | 0                                                               | 0                                                              | 0                                                                                                  | 0                                      |
| Dahlöf, et al.                                           | 1991        | 0                                                        | 0                                                               | 0                                                              | 0                                                                                                  | 0                                      |
| DREAM Trial Investigators                                | 2006        | 1                                                        | 0                                                               | 0                                                              | 0                                                                                                  | 0                                      |
| DREAM Trial Investigators                                | 2006        | 1                                                        | 0                                                               | 0                                                              | 0                                                                                                  | 0                                      |
| Fox, et al.                                              | 2003        | 1                                                        | 0                                                               | 0                                                              | 0                                                                                                  | 0                                      |
| Hansson, et al.                                          | 1994        | 1                                                        | 0                                                               | 0                                                              | 0                                                                                                  | 0                                      |
| Hansson, et al.                                          | 1998        | 0                                                        | 0                                                               | 0                                                              | 0                                                                                                  | 0                                      |
| Heart Outcomes Prevention Evaluation Study Investigators | 2000        | 0                                                        | 0                                                               | 0                                                              | 0                                                                                                  | 0                                      |
| Lewington, et al.                                        | 2002        | 0                                                        | 0                                                               | 0                                                              | 1                                                                                                  | 1                                      |
| Lithell, et al.                                          | 2003        | 0                                                        | 0                                                               | 0                                                              | 0                                                                                                  | 0                                      |
| Liu L, et al.                                            | 1998        | 0                                                        | 0                                                               | 0                                                              | 0                                                                                                  | 0                                      |
| Liu L, et al.                                            | 2009        | 0                                                        | 0                                                               | 0                                                              | 0                                                                                                  | 0                                      |



|                                 |      |   |   |   |   |   |
|---------------------------------|------|---|---|---|---|---|
| Liu L, et al.                   | 2005 | 0 | 0 | 0 | 1 | 1 |
| Lonn et al.                     | 2016 | 0 | 0 | 0 | 0 | 0 |
| Lüders S, et al.                | 2008 | 0 | 0 | 0 | 0 | 0 |
| MacMahon S, et al.              | 2000 | 0 | 0 | 0 | 0 | 0 |
| Marre M, et al.                 | 2004 | 1 | 0 | 0 | 0 | 0 |
| MRC Working Party               | 1992 | 0 | 0 | 0 | 1 | 1 |
| NAVIGATOR Study Group           | 2010 | 0 | 0 | 0 | 0 | 0 |
| Neaton, JD, et al.              | 1993 | 0 | 0 | 0 | 0 | 0 |
| Nissen SE, et al.               | 2004 | 0 | 0 | 0 | 0 | 0 |
| Ogihara T, et al.               | 2010 | 0 | 0 | 0 | 1 | 1 |
| Patel A, et al.                 | 2007 | 0 | 0 | 0 | 0 | 0 |
| Pitt B, et al.                  | 2000 | 0 | 0 | 0 | 0 | 0 |
| Poole-Wilson PA, et al.         | 2004 | 0 | 0 | 0 | 0 | 0 |
| Poole-Wilson PA, et al.         | 2004 | 0 | 0 | 0 | 0 | 0 |
| SHEP Cooperative Research Group | 1984 | 0 | 0 | 0 | 0 | 0 |
| PROGRESS Collaborative Group    | 2001 | 0 | 0 | 0 | 0 | 0 |
| Schrier RW, et al.              | 2002 | 0 | 0 | 0 | 0 | 0 |
| SPRINT Research Group           | 2015 | 0 | 0 | 0 | 0 | 0 |
| SPS3 Study Group                | 2013 | 0 | 0 | 0 | 0 | 0 |
| Stamler J, et al.               | 1989 | 0 | 0 | 0 | 1 | 1 |
| TRANSCEND Investigators         | 2008 | 0 | 0 | 0 | 0 | 0 |
| The Dutch TIA Trial Study Group | 1993 | 1 | 0 | 0 | 0 | 0 |

**Supplementary Table 13: Study quality for all included studies, vegetables and ischemic heart disease**

In this presentation of the data, there is one row per study.

| Author        | Year | Exposure Measurement Score (multiple-0, single-1) | Exposure Assessment Score (objective-0 vs self-report-1) | Outcome Assessment Score (objective-0 vs self-report-1) | Confounders Score (age,sex,smoking, income,education-0; age,sex,smoking-1; age,sex-2) | Quality Score (best-0, worst-5) |
|---------------|------|---------------------------------------------------|----------------------------------------------------------|---------------------------------------------------------|---------------------------------------------------------------------------------------|---------------------------------|
| Bhupathiraju  | 2013 | 0                                                 | 1                                                        | 0                                                       | 2                                                                                     | 3                               |
| Dauchet       | 2010 | 1                                                 | 1                                                        | 0                                                       | 2                                                                                     | 4                               |
| Hansen        | 2010 | 1                                                 | 1                                                        | 0                                                       | 1                                                                                     | 3                               |
| Knekt         | 1994 | 1                                                 | 1                                                        | 0                                                       | 2                                                                                     | 4                               |
| Kobylecki     | 2015 | 1                                                 | 1                                                        | 0                                                       | 1                                                                                     | 3                               |
| Liu           | 2000 | 1                                                 | 1                                                        | 1                                                       | 2                                                                                     | 5                               |
| Miller        | 2017 | 1                                                 | 1                                                        | 0                                                       | 1                                                                                     | 3                               |
| Perez-Cornago | 2021 | 1                                                 | 1                                                        | 0                                                       | 0                                                                                     | 2                               |
| Pietinen      | 1996 | 1                                                 | 1                                                        | 0                                                       | 2                                                                                     | 4                               |
| Rebello       | 2014 | 1                                                 | 1                                                        | 0                                                       | 2                                                                                     | 4                               |
| Sharma        | 2014 | 1                                                 | 1                                                        | 0                                                       | 2                                                                                     | 4                               |
| Sonestedt     | 2015 | 1                                                 | 1                                                        | 0                                                       | 1                                                                                     | 3                               |
| Stefler       | 2016 | 1                                                 | 1                                                        | 0                                                       | 1                                                                                     | 3                               |
| Tognon        | 2014 | 1                                                 | 1                                                        | 0                                                       | 2                                                                                     | 4                               |
| Yoshizaki     | 2020 | 1                                                 | 1                                                        | 0                                                       | 1                                                                                     | 3                               |
| Yu            | 2014 | 1                                                 | 1                                                        | 0                                                       | 0                                                                                     | 2                               |
| Zhang         | 2021 | 1                                                 | 1                                                        | 0                                                       | 1                                                                                     | 3                               |

**Supplementary Table 14: Study quality for all included studies, unprocessed red meat and ischemic heart disease**

In this presentation of the data, there is one row per study.

| <b>Report</b>  | <b>Cohort name</b>                                                  | <b>Exposure Measurement Score (multiple prospective measurements-0, single baseline prospective measurement -1)</b> | <b>Exposure Assessment Score (objective-0 vs self-report-1)</b> | <b>Outcome Assessment Score (objective-0 vs self-report-1)</b> | <b>Confounders Score (age,sex,smoking, income or education-0; age,sex,smoking-1; age,sex-2)</b> | <b>Quality Score (best-0, worst-5)</b> |
|----------------|---------------------------------------------------------------------|---------------------------------------------------------------------------------------------------------------------|-----------------------------------------------------------------|----------------------------------------------------------------|-------------------------------------------------------------------------------------------------|----------------------------------------|
| Al-Shaar 2020  | Health Professionals Follow-Up Study                                | 0                                                                                                                   | 1                                                               | 0                                                              | 1                                                                                               | 2                                      |
| Bernstein 2010 | Nurses' Health Study                                                | 1                                                                                                                   | 1                                                               | 0                                                              | 1                                                                                               | 3                                      |
| Fraser* 1999   | Adventist Health Study                                              | 1                                                                                                                   | 1                                                               | 0                                                              | 1                                                                                               | 3                                      |
| Haring 2014    | Atherosclerosis Risk in Communities Study (ARIC)                    | 0                                                                                                                   | 1                                                               | 0                                                              | 1                                                                                               | 2                                      |
| Key 2019       | European Prospective Investigation into Cancer and Nutrition (EPIC) | 1                                                                                                                   | 1                                                               | 0                                                              | 1                                                                                               | 3                                      |
| Möller 2021    | Danish National Survey on Diet and Physical Activity                | 1                                                                                                                   | 1                                                               | 0                                                              | 0                                                                                               | 2                                      |
| Nagao 2012     | Japan Collaborative Cohort Study                                    | 1                                                                                                                   | 1                                                               | 0                                                              | 2                                                                                               | 4                                      |
| Papier 2021    | UK BIOBANK                                                          | 1                                                                                                                   | 1                                                               | 0                                                              | 0                                                                                               | 2                                      |
| Takata 2013    | Shanghai Men's Health study                                         | 1                                                                                                                   | 1                                                               | 0                                                              | 0                                                                                               | 2                                      |
| Takata 2013    | Shanghai Women's Health Study                                       | 1                                                                                                                   | 1                                                               | 0                                                              | 0                                                                                               | 2                                      |
| Whiteman 1999  | OXCHECK Study                                                       | 1                                                                                                                   | 1                                                               | 0                                                              | 1                                                                                               | 3                                      |
